1 **Research Article | LARGE-SCALE BIOLOGY**

2 **Metatranscriptomic comparison of endophytic and pathogenic *Fusarium*–*Arabidopsis***  
3 **interactions reveals plant transcriptional plasticity**

4

5 Li Guo<sup>1,#</sup>, Houlin Yu<sup>2,#</sup>, Bo Wang<sup>1,#</sup>, Kathryn Vescio<sup>2</sup>, Gregory A. DeIulio<sup>2</sup>, He Yang<sup>2</sup>, Andrew  
6 Berg<sup>2</sup>, Lili Zhang<sup>2</sup>, Véronique Edel-Hermann<sup>3</sup>, Christian Steinberg<sup>3</sup>, H. Corby Kistler<sup>4</sup>, Li-Jun  
7 Ma<sup>2,†</sup>

8 <sup>1</sup> *MOE Key Laboratory for Intelligent Networks & Network Security, Faculty of Electronic and*  
9 *Information Engineering, School of Life Science and Technology, Xi'an Jiaotong University,*  
10 *Xi'an 710049 China*

11 <sup>2</sup> *Department of Biochemistry and Molecular Biology, University of Massachusetts Amherst,*  
12 *Amherst MA 01003 USA*

13 <sup>3</sup> *Agroécologie, AgroSup Dijon, INRA, University of Bourgogne Franche-Comté, F-21000 Dijon,*  
14 *France.*

15 <sup>4</sup> *USDA ARS Cereal Disease Laboratory, University of Minnesota, St. Paul, MN, 55108, USA*

16

17 # These authors contributed equally to this work.

18 † Corresponding authors: [lijun@biochem.umass.edu](mailto:lijun@biochem.umass.edu) (LJM)

19

20 The authors responsible for distribution of materials integral to the findings presented in this  
21 article in accordance with the policy described in the Instructions for Authors ([www.plantcell.org](http://www.plantcell.org))  
22 is: [lijun@biochem.umass.edu](mailto:lijun@biochem.umass.edu)

23

24 **Short title: *Arabidopsis*–*Fusarium* metatranscriptomics**

25 **One-sentence summary:** Multiomics analysis reveals the regulatory plasticity of plants in  
26 response to beneficial and antagonistic microbes, resulting in distinct phenotypes and rewired  
27 transcriptional networks.

28

## 29 **ABSTRACT**

30 Plants are continuously exposed to beneficial and pathogenic microbes, but how plants recognize  
31 and respond to friends versus foes remains poorly understood. Here, we compared the molecular  
32 response of *Arabidopsis thaliana* independently challenged with a *Fusarium oxysporum*  
33 endophyte Fo47 versus a pathogen Fo5176. These two *Fusarium oxysporum* strains share a core  
34 genome of about 46 Mb, in addition to unique 1,229 and 5,415 accessory genes.  
35 Metatranscriptomic data reveal a shared pattern of expression for most plant genes (~80%) in  
36 responding to both fungal inoculums at all time points from 12 to 96 h post inoculation (HPI).  
37 However, the distinct responding genes depict transcriptional plasticity, as the pathogenic  
38 interaction activates plant stress responses and suppresses plant growth/development related  
39 functions, while the endophytic interaction attenuates host immunity but activates plant nitrogen  
40 assimilation. The differences in reprogramming of the plant transcriptome are most obvious in 12  
41 HPI, the earliest time point sampled and are linked to accessory genes in both fungal genomes.  
42 Collectively, our results indicate that the *A. thaliana* and *F. oxysporum* interaction displays both  
43 transcriptome conservation and plasticity in the early stages of infection, providing insights into  
44 the fine-tuning of gene regulation underlying plant differential responses to fungal endophytes  
45 and pathogens.

46

47 **Keywords:** *Arabidopsis thaliana*, comparative genomics, endophyte, *Fusarium oxysporum*,  
48 host–fungal interactions, pathogen

49

50

## 51 **INTRODUCTION**

52 Over millions of years of coevolution, plants and microbes have established intimate  
53 relationships, forming beneficial, neutral, or antagonistic partnerships. Plant pathogens threaten  
54 agricultural production and global food security (Dean et al., 2012; Strange and Scott, 2005), but  
55 beneficial microbes, such as rhizobia, mycorrhizae, and endophytes limit plant pests and promote  
56 plant growth through nutrient mineralization and availability (Rashid et al., 2016; White et al.,  
57 2019). How plants recognize and react differently to friends versus foes is an intriguing topic of  
58 research.

59  
60 Our understanding of plant immunity has been revolutionized by the recent increase in the  
61 breadth of genomic data available. The classical, binary view of plant immunity consists of  
62 pattern-triggered immunity (PTI) and effector-triggered immunity (ETI) (Jones and Dangl, 2006;  
63 Cui et al., 2015). Plant PTI relies on plasma membrane (PM)-localized pattern recognition  
64 receptors (PRRs), which are often receptor-like proteins/kinases (RLPs/RLKs) that sense  
65 conserved microbe-associated molecular patterns (MAMPs) or damage-associated molecular  
66 patterns (DAMPs) and induce downstream defense reactions (Bigeard et al., 2015; Dodds and  
67 Rathjen, 2010; Jones and Dangl, 2006; Zhou et al., 2020). Plant ETI employs an intracellular  
68 nucleotide-binding site and leucine-rich repeat domain receptors (NLRs) that recognize specific  
69 microbial effectors as a result of ongoing host-pathogen coevolution (Jones and Dangl, 2006; Cui  
70 et al., 2015; Wang et al., 2020b; Cesari, 2018; Monteiro and Nishimura, 2018). The oftentimes  
71 blurry boundary between MAMPs and effectors prompted a new spatial immunity model based  
72 on extracellular or intracellular locations of pattern recognition (Wang et al., 2020b; van der  
73 Burgh and Joosten, 2019).

74  
75 The comparative study by Baetsen-Young and colleagues (2020) revealed transcriptional  
76 reprogramming of *Fusarium virguliforme* when interacting with different plant hosts (soybean  
77 versus maize). This study investigated transcriptome reprogramming of the same plant host and  
78 explored how PTI and ETI or extracellular and intracellular immunity are involved in both  
79 beneficial and antagonistic interactions. We established the *Fusarium oxysporum*–*Arabidopsis*  
80 *thaliana* model system, which includes an endophyte, *F. oxysporum* strain Fo47, and a pathogen,  
81 *F. oxysporum* strain Fo5176. *Arabidopsis* plants infected by these two *F. oxysporum* strains  
82 display distinctive phenotypes, with Fo5176 causing typical vascular wilt diseases and Fo47  
83 colonizing plants endophytically without any disease symptoms. Their distinct effects on plants,  
84 combined with their minimal genetic diversity (the two strains belong to the same species),  
85 should facilitate the identification of meaningful genotype–phenotype correlations.

86  
87 In addition to being a good model system, *F. oxysporum* is of great agricultural importance, as it  
88 is listed among the top 10 most researched fungal pathogens for food production (Dean et al.,  
89 2012). Collectively, this group of filamentous fungi causes devastating vascular wilt diseases in

90 over 100 crop species, leading to annual yield losses of billions of dollars (Ma et al., 2013). One  
91 notorious example is the recent Panama disease outbreak in banana caused by *F. oxysporum* f. sp.  
92 *cubense* Tropical Race 4 (Viljoen et al., 2020). Information accumulated over the past 10 years  
93 has provided a clear picture of compartmentalization of the *F. oxysporum* genome: A core  
94 genome component that is conserved and vertically transmitted performs essential housekeeping  
95 functions, and an accessory genome that is believed to have been initially acquired horizontally  
96 mediates unique host–fungal interactions (Yang et al., 2020; Ma et al., 2010, 2013; Zhang;  
97 Vlaardingerbroek et al., 2016b, 2016a; DeIulio et al., 2018; Hane et al., 2011; Williams et al.,  
98 2016; Galazka and Freitag, 2014; Armitage et al., 2018; van Dam et al., 2016; Dong et al., 2015).  
99

100 Using an unbiased approach and taking advantage of two recently released high-quality genome  
101 assemblies of Fo47 and Fo5176 (Wang et al. 2020; Fokkens et al. 2020), we employed  
102 metatranscriptomics to dissect how Arabidopsis plants react to two *F. oxysporum* isolates with  
103 distinct lifestyles during the early course of infection. We demonstrated that endophytic infection  
104 suppresses host immunity but activates plant nutrient assimilation. By contrast, pathogenic  
105 infection activated defense response but suppressed plant developmental functions. Genome  
106 comparison of the two isolates revealed unique accessory chromosomes that harbor genes  
107 enriched for fungal virulence and detoxification in Fo5176, and cell signaling and nutrient  
108 sensing in Fo47. Our study showed that while for both plants and *F. oxysporum*, most genes  
109 displayed a similar expression pattern during infections, a small number of genes displayed  
110 transcription plasticity between endophytic and pathogenic infections, perhaps leading to the  
111 different interaction outcomes.

112

113

## 114 RESULTS

### 115 A pathosystem that reveals both endophytic and pathogenic interactions

116 To dissect beneficial versus pathogenic fungal–plant interactions, we inoculated *Arabidopsis*  
117 plants with two *F. oxysporum* strains, the beneficial (endophytic) strain Fo47 and the pathogenic  
118 strain Fo5176. The pathogenic fungus Fo5176, initially isolated in Australia (Thatcher et al.,  
119 2012; Chen et al., 2015), causes vascular wilt in several Brassicaceae plants, including *A.*  
120 *thaliana* (Thatcher et al., 2009; Ma et al., 2010). The endophytic strain Fo47 was originally  
121 isolated from disease-suppressing soils (Alabouvette, 1999) and has been used as a biocontrol  
122 agent to prevent disease from soil-borne pathogens by inducing the production of plant  
123 secondary metabolites and priming host resistance (Aimé et al., 2013; Olivain et al., 2006;  
124 Benhamou et al., 2002; Benhamou and Garand, 2001; Veloso and Díaz, 2012).

125  
126 We adopted a robust and reproducible root-dipping protocol to inoculate 14-d-old Col-0 plants  
127 with a suspension of fungal spores (Thatcher et al., 2012). Plants inoculated with Fo5176  
128 developed typical yellowing and wilting symptoms, visible at 6 d post inoculation (DPI) (Figure  
129 1A). By then, the fungal hyphae had advanced into the stele of infected roots (Figure 1B), as  
130 revealed by staining with 5-bromo-4-chloro-3-indoxyl- $\alpha$ -L-arabinofuranoside (X-ARA), which  
131 is hydrolyzed to a blue precipitate by a fungal-derived enzyme (Diener, 2012). Almost all  
132 Fo5176-infected plants died within 3 weeks of inoculation (Figure 1C). By contrast, plants  
133 inoculated with Fo47 not only stayed healthy (Figure 1A, C), but also showed increased  
134 aboveground biomass (Wilcoxon rank-sum test,  $p < 0.001$ ), when compared to mock-inoculated  
135 plants (Figure 1D), suggesting that Fo47 may have a growth-promoting effect. X-ARA staining  
136 of plant roots inoculated with Fo47 determined that fungal hyphae were restricted to the root  
137 outer layers (Figure 1B).

138  
139 By comparing to a sister species *F. verticillioides*, accessory chromosomes were identified in  
140 both the Fo47 (Wang et al., 2020a) and Fo5176 (Fokkens et al., 2020) genomes, in addition to  
141 the 11 core chromosomes (Figure 2), vertically inherited from the common ancestor shared  
142 between these two sister species 10–11 million years ago (Ma et al., 2013). The Fo47 genome  
143 had one accessory chromosome (chromosome 7, with a length of 4.25 Mb), while the Fo5176  
144 genome had four (chromosomes 2, 14, 16, and 18) (Figure 2). The combined length of accessory

145 chromosomes/regions in Fo5176 was 21.63 Mb, including large segments (size > 1 Mb) of  
146 chromosomes 4, 10, 11, and 13 that shared no syntenic block with the *F. verticillioides* genome.  
147 Fo47 and Fo5176 accessory chromosomes were enriched in repetitive sequences (Supplemental  
148 Figure 1), a common property observed from all accessory chromosomes (Yang et al., 2020).  
149 Fo47 accessory genes were significantly enriched for cell signaling and nutrient sensing  
150 functions, whereas Fo5176 genes were enriched for functions relating to virulence and  
151 detoxification (Supplemental Data Sets 1 and 2). As these two genomes share an almost identical  
152 core sequence, we hypothesized that distinct accessory chromosomes in each genome may play  
153 important roles in the distinct phenotypic outcomes (disease versus growth promotion).

154

### 155 **Reprogramming of the plant transcriptome in response to a fungal pathogen or endophyte**

156 To examine the transcriptional regulation underlying the distinct endophytic and pathogenic  
157 interactions of the two strains (Figure 1), we sequenced the fungal and host plant transcriptomes  
158 from *Arabidopsis* plants inoculated with Fo47 or Fo5176. Infected plants were sampled at 12, 24,  
159 48, and 96 h post inoculation (HPI), in parallel with plants mock-inoculated with water at 12 HPI  
160 as a control. We harvested root tissues for transcriptome deep sequencing (RNA-seq). Dual  
161 RNA-seq data were analyzed using an in-house pipeline to calculate the transcript levels of plant  
162 and fungal genes.

163

164 About half of all annotated *Arabidopsis* genes (16,544 out of a total of 32,833) were  
165 differentially regulated in at least one of 18 comparisons between different time points for the  
166 same interaction type (12, 24, 48, and 96 HPI; 12 comparisons), between different interaction  
167 types at the same time point (beneficial versus pathogenic; four comparisons), or between  
168 endophytic or pathogenic interactions and the mock control at 12 HPI (two comparisons). These  
169 differentially expressed genes (DEGs) revealed several interesting patterns (Figure 3A).

170

171 First, we observed a strong correlation between patterns of gene expression for both treatments at  
172 the same time points, despite clearly distinctive endophytic and pathogenic phenotypes (Figure  
173 1). The Pearson's correlation coefficients (PCCs) for the four comparisons between plants  
174 infected with either the beneficial or the pathogenic fungal strain at each time point were very  
175 high, with values of 0.95, 0.94, 0.97, and 0.96 at 12, 24, 48, and 96 HPI, respectively (labeled in

176 red in Figure 3A), suggesting that a small subset of genes contribute to the observed phenotypic  
177 differences. Global clustering analysis using the 16,544 Arabidopsis DEGs yielded 24 co-  
178 expression gene clusters (Figure 3B, Supplemental Figure 2, Supplemental Data Set 3). A total  
179 of 10,014 genes within 12 clusters had similar expression patterns at all time points (see  
180 Supplemental Data Set 3), accounting for 60.5% of all DEGs. Considering the fact that 16,289  
181 genes were either not expressed or not changed, we concluded that 6,544 (~20% of all) genes  
182 held answers to the transcriptional reprogramming between these two treatments.

183

184 We also observed significant transcriptional reprogramming within each interaction over time.  
185 For samples inoculated with Fo47, PCC scores decreased from 0.94 (between 12 and 24 HPI) to  
186 0.84 (between 12 and 96 HPI) as infection progressed. Similarly, PCC values dropped from 0.93  
187 (between 12 and 24 HPI) to 0.81 (between 12 and 96 HPI) for Fo5176-inoculated plants. We  
188 then compared each fungal interaction pairwise at each time point to identify reciprocal DEGs  
189 (Supplemental Figure 3A), yielding 1,009, 642, 59, and 403 genes that were preferentially  
190 expressed in Fo47-infected plants and 868, 1,172, 604, and 425 plant genes in Fo5176-infected  
191 plants at 12, 24, 48, and 96 HPI, respectively (Supplemental Figure 3B). Notably, plant genes  
192 that were preferentially expressed during the endophytic interaction were enriched in Gene  
193 Ontology (GO) terms such as cell cycle, cell growth, development, response to stimuli, and  
194 cellular transport. Moreover, the genes associated with each enriched GO term showed a  
195 temporal wave as the infection course progressed, with genes involved in cell cycle highly  
196 enriched at the early stages of infection, but with a diminishing contribution that was  
197 consecutively replaced by genes related to development at around 24 HPI, response to stimuli at  
198 48 HPI, and transport at 96 HPI (Supplemental Figure 3C). Conversely, genes preferentially  
199 induced in response to the pathogenic fungus were consistently enriched in GO terms mainly  
200 related to defense responses, with no obvious underlying temporal pattern (Supplemental Figure  
201 3C).

202

203 Second, when compared to the mock-inoculated samples, plants inoculated with Fo47 or Fo5176  
204 both displayed drastic transcriptional reprogramming at the earliest time point of this study (12  
205 HPI), as these comparisons had the lowest PCCs of 0.85 for Fo47 and 0.83 for Fo5176. As time  
206 from initial inoculation progressed, however, the transcriptomes of all plants became much more

207 similar, with PCCs rising to 0.98 for Fo47 and 0.96 for Fo5176 (labeled in green in Figure 3A).  
208 This observation indicated that the outcome of the plant–host interaction might be decided as  
209 early as 12 HPI. To begin to dissect the critical transcriptional reprogramming taking place at 12  
210 HPI in both endophytic and pathogenic interactions, we conducted a careful analysis to identify  
211 genes that are not only differentially expressed between the two treatments, but also  
212 differentially expressed relative to mock-inoculated samples. This analysis resulted in the  
213 identification of genes that were specifically upregulated or downregulated in fungus-infected  
214 samples. These four plant gene sets consisted of 140 upregulated and 422 downregulated genes  
215 specifically in response to Fo47 infection, and 286 upregulated and 767 downregulated genes in  
216 response to Fo5176 infection.

217  
218 Functional analysis of these genes using GO enrichment and network analyses (Figure 4,  
219 Supplemental Data Set 4–7) confirmed previous observations of fungal–plant interactions but  
220 also revealed unexpected findings. As expected, we observed significant suppression of genes  
221 related to plant growth by the pathogenic strain Fo5176 (Figure 4A), including genes associated  
222 with the cell cycle, cell wall organization, plant-type cell wall biosynthesis, and microtubule-  
223 based processes. Genes upregulated early in response to Fo5176 infection were highly enriched  
224 in toxin and indole metabolism, as well as small molecule biosynthesis (Figure 4B), possibly  
225 reflecting the initial upheaval brought upon by the infection. For the endophytic interaction, we  
226 noticed a significant suppression of immunity-related functions, including plant  
227 defense/immunity and jasmonic acid response (Figure 4C). This data therefore also suggested  
228 that the endophytic strain Fo47 attenuates plant defenses. Among the genes induced by the  
229 endophyte, we were pleased to see that several define a module related to nitrate metabolism and  
230 anion transport (Figure 4D), which would be consistent with the promotion of plant growth by  
231 Fo47 (Figure 1D).

232  
233 A nitrate–CPK (Ca<sup>2+</sup>-sensor protein kinase)–NLP (Nin-like protein) signaling pathway was  
234 previously reported (Liu et al., 2017) that activated the expression of 394 genes and repressed  
235 another 79 genes in response to exogenous nitrate treatment. We examined whether our clusters  
236 of DEGs (Figure 3B) showed an overrepresentation of genes differentially regulated by this  
237 nitrate signaling pathway. Cluster 21 included the most downregulated genes from this pathway,



238 with eight genes ( $p$ -value =  $2.56e-04$ , two-sided Fisher's exact test) that were downregulated in  
239 both interactions, with stronger suppression by the endophyte (Supplemental Figure 2,  
240 Supplemental Data Set 8). Of the 394 upregulated genes in the nitrate pathway, 329 were  
241 differentially expressed in our data set, with 251 assigned to clusters. Of those, over half were  
242 significantly enriched in five clusters: C5 (20 genes,  $p$ -value =  $2.12e-05$ ), C6 (14 genes,  $p$ -value  
243 =  $1.07e-05$ ), C8 (40 genes,  $p$ -value =  $1.46e-14$ ), C16 (16 genes,  $p$ -value =  $7.37e-04$ ), and C23  
244 (38 genes,  $p$ -value =  $6.62e-21$ ). These 251 genes, representing a majority of the genes  
245 upregulated in the nitrate signaling pathway, were induced by both the endophyte and the  
246 pathogen but exhibited stronger responses in the context of endophytic inoculations  
247 (Supplemental Figure 2).

248  
249 Notably, cluster C23 included *NLPI*, encoding a transcription factor involved in the nitrate–  
250 CPK–NLP signaling pathway (Liu et al., 2017), as well as *NITRATE TRANSPORTER2.1* and *2.2*  
251 (*NRT2.1*, *NRT2.2*), *NITRATE REDUCTASE1* (*NIA1*), and *NITRITE REDUCTASE1* (*NIR1*), all  
252 major components of the pathway that were upregulated when compared to the mock-inoculated  
253 sample (Supplemental Figure 4). Out of 24 previously reported transcription factors that control  
254 transcriptional regulation of nitrogen-associated metabolism and growth (Gaudinier et al., 2018),  
255 16 of them were assigned to our clusters (Supplemental Data Set 9), including *WUSCHEL*  
256 *RELATED HOMEODOMAIN14* (*WOX14*) and *LOB DOMAIN-CONTAINING PROTEIN4* (*LBD4*) in  
257 cluster C23. Collectively, this analysis suggests that nitrogen signaling is involved in the *F.*  
258 *oxysporum*–*Arabidopsis* interaction and the endophyte may enhance the nitrogen signal and  
259 hence change the course of the plant response.

## 260 261 **Perturbation of plant immunity**

262 To better understand how the endophyte and the pathogen perturb plant immunity via shared and  
263 distinct responses, we carefully investigated the 24 co-expression clusters based on their global  
264 patterns of expression. Four clusters, C7, C15, C16, and C21, showed enrichment ( $p < 0.05$ ) for  
265 GO terms related to immunity and defense responses; the same clusters also lacked GO terms  
266 related to development (Figure 3C). Compared to plant PTI and ETI networks (consisting of  
267 1,856 PTI-related and 1,843 ETI-related genes) previously constructed using a machine learning  
268 algorithm (Dong et al., 2015), three clusters (C15, C16, and C21) were enriched for both PTI and

269 ETI genes, whereas cluster C7 was primarily enriched in PTI response genes (two-sided Fisher's  
270 exact test  $p < 0.05$ ) (Supplemental Data Sets 10 and 11). This suggests a transcriptional plasticity  
271 of plant immunity in responding to the endophytic and pathogenic *F. oxysporum*.

272

### 273 ***Conserved immune response toward an endophyte and a pathogen***

274 Cluster C15 comprised 1,290 genes and was the largest immunity-related cluster, with nearly  
275 identical plant transcriptome responses following Fo47 and Fo5176 inoculation. Indeed, genes  
276 from cluster C15 were initially strongly upregulated at 12 HPI in both interactions and gradually  
277 returned to an expression level comparable to that of mock-inoculated plants as infection  
278 progressed (Figure 5A). C15 was most significantly enriched in PTI genes ( $p$ -value =  $2.66e-72$ ),  
279 reflecting the general plant perception of fungal signals derived from both pathogenic and  
280 symbiotic organisms (*e.g.* MAMPs). Cluster C15 indeed included many immunity-related genes  
281 involved in fungal perception, signal transduction, and transcriptional regulation, including  
282 *ERECTA*, a RLK that regulates stomatal patterning and immunity (Sopeña-Torres et al., 2018);  
283 *RECOGNITION OF PERONOSPORA PARASITICA5 (RPP5)*, which encodes a putative NLR  
284 protein that confers resistance to *Peronospora parasitica* (Noël et al., 1999; Parker et al., 1997);  
285 *RESPONSIVE TO DEHYDRATION 21A (RD21A)*, which encodes a cysteine proteinase with  
286 peptide ligase and protease activity that is involved in immune responses against the  
287 necrotrophic fungal pathogen *Botrytis cinerea* (Lampl et al., 2013); and *NUCLEAR FACTOR Y*,  
288 *SUBUNIT B3 (NF-YB3)*, which encodes a transcription factor activated by endoplasmic  
289 reticulum (ER) stress responsible for the regulation of stress responses (Liu and Howell, 2010).

290

291 Cluster C15 was also highly enriched in genes with functions related to the chloroplast/plastid  
292 ( $p$ -value =  $9.2e-89$ , Figure 5B, Supplemental Data Set 12). An organelle essential for plant  
293 photosynthesis, chloroplasts have recently come to the forefront as key players in plant immune  
294 responses (Göhre et al., 2012; Serrano et al., 2016), possibly functioning as a signaling hub that  
295 links the initial recognition of diverse pathogens at the PM and signal transduction to the nucleus  
296 to orchestrate transcriptional reprogramming in response to infection (Medina-Puche et al., 2020;  
297 Chan et al.; de Souza et al., 2017; Wang et al., 2016; de Torres Zabala et al., 2015; Liu, 2016). It  
298 is unlikely that chloroplast-related genes from cluster C15 represent artifacts caused by the  
299 manipulation of roots in the light during harvesting, as these genes were expressed at low levels

300 in mock-inoculated plants, although they were subjected to the same inoculation and harvesting  
301 procedure. Our observations are also consistent with a previous report in which strain Fo5176  
302 was shown to induce the expression of Arabidopsis genes normally involved in photosynthesis in  
303 root tissues at 1 DPI (Lyons et al., 2015). Pathogens may thus interfere with host  
304 chloroplast/plastid functions to manipulate host immunity in their favor. We know very little  
305 about the possible role played by chloroplasts during endophytic colonization.

306

### 307 ***Stronger induction of plant PTI responses by the pathogen***

308 We hypothesized that a subset of plant immune responses against the pathogen and endophyte  
309 would differ, given their distinctive phenotypes, even though most clusters showed the same  
310 pattern during endophytic and pathogenic responses. Indeed, three immunity-related clusters, C7,  
311 C16, and C21, exhibited distinct patterns between the pathogen and the endophyte (Figure 5A).  
312 Cluster C7 (422 genes), which was primarily enriched in genes associated with PTI, exhibited a  
313 stronger induction by Fo5176 infection than by Fo47, despite being induced by both strains  
314 (Figure 5A). Several GO terms were shared between clusters C7 and C15, such as  
315 chloroplast/plastid-related functions (Figure 5B), possibly reflecting fine-tuning of the initial  
316 recognition of conserved fungal signals.

317

318 Interesting genes included *PEROXIDASE37 (PRX37)*, encoding a putative apoplastic peroxidase  
319 that generates H<sub>2</sub>O<sub>2</sub> primarily in the vascular bundles for host defense (Pedreira et al., 2011), and  
320 *PENETRATION2 (PEN2)*, encoding an atypical tyrosinase required for broad-spectrum  
321 resistance to filamentous plant pathogens (Fuchs et al., 2016). Also included in cluster 7 were  
322 genes with dual functional roles in immunity against different pathogens. For instance,  
323 *PATATIN-LIKE PROTEIN2 (PLP2)* promotes cell death and facilitates *Botrytis cinerea* and  
324 *Pseudomonas syringae* infection in Arabidopsis (La Camera et al., 2005), whereas it confers host  
325 resistance to Cucumber mosaic virus (Camera et al., 2009). *KUNITZ TRYPSIN INHIBITOR1*  
326 (*KTII*), a trypsin inhibitor referred as an antagonist involved in the negative regulation of  
327 programmed cell death that mediates susceptibility in *Erwinia carotovora* but has an opposite  
328 function in *Pseudomonas syringae* pv *tomato* DC3000 (Li et al., 2008).

329

### 330 ***Suppressed plant immunity in the presence of the endophyte***

331 In contrast to clusters C7 and C15, both clusters C16 (615 genes) and C21 (766 genes) exhibited  
332 stronger suppression of expression by the endophyte (Figure 5A). We also observed a unique and  
333 specific suppression of plant immunity by the endophyte from the GO term enrichment and  
334 network analyses at 12 HPI described above (Figure 4C). While clusters C7 and C15 showed  
335 minimal overlap of enriched GO terms, clusters C16 and C21 shared many terms, including  
336 signal perception and transduction, protein–protein interaction, and PM localization (Figure 5B).  
337 Out of 70 genes identified as contributing to danger sensing and signaling systems (Zhou and  
338 Zhang, 2020), we detected 12 genes in cluster C16 and another 12 genes in cluster C21 (Table 1  
339 and Supplemental Data Set 13). For instance, PRRs and downstream components in cluster C16  
340 include *EFR*, *BAK1*, *LYK5*, and *CERK1*; and *PEPR1*, *PEPR2*, *FERONIA*, and *RBOHD* in cluster  
341 C21. NLRs and downstream signaling components in cluster C16 include *ADR1-L1/ADR1-L2*  
342 and *RPM1*, *PAD4*, and *RPS4* in cluster C21. In summary, a strong suppression of diverse  
343 immunity-related genes is unique to the endophytic interaction, suggesting that modulation of  
344 plant immunity may contribute to the different outcomes.

345

#### 346 **A systematic analysis of PTI- and ETI-sensing genes induced by the endophyte and the** 347 **pathogen**

348 Overall, we observed strong host immune responses when challenged with either the endophyte  
349 or the pathogen, involving complex signal perception and signal transduction cascades. Distinct  
350 responses included the suppression of plant growth and the induction of plant defenses by the  
351 pathogenic strain Fo5176 and the attenuation of host immunity with the concomitant induction of  
352 nitrogen metabolism by the endophytic strain Fo47 (Figure 4). To further dissect the plant  
353 immunity pathways involved in these two interactions, we conducted a systematic analysis of the  
354 expression profiles of genes encoding RLPs/RLKs and NLR proteins (See supplementary data 14  
355 and 15 and examples in Table 1).

356

#### 357 ***RLP/RLK* genes**

358 The Arabidopsis genome encodes 533 RLPs/RLKs, as determined by the MAPMAN Mercator  
359 annotation (Schwacke et al., 2019). Of those, 311 were assigned to our clusters of DEGs  
360 (Supplemental Data Set 14). In addition to the two immunity clusters C16 (37 genes,  $p$ -value =  
361 4.76e-11) and C21 (30 genes,  $p$ -value = 2.11e-05), whose expression is repressed by the

362 endophyte, these *RLP/RLK* genes were also enriched in clusters C11 (14 genes,  $p$ -value = 6.31e-  
363 04) and C12 (11 genes,  $p$ -value = 6.31e-04). Their expression appeared to be repressed by both  
364 the endophyte and the pathogen to varying degrees. Characterized defense-related *RLK* genes  
365 include *SUPPRESSOR OF BIR1 (SOBIR1)* and *EFR* in cluster C16 and *RESISTANCE TO*  
366 *FUSARIUM OXYSPORUM1 (RFO1)* and *PROLINE-RICH EXTENSIN-LIKE RECEPTOR*  
367 *KINASE1 (PERK1)* in cluster C21. *RFO1* encodes a protein that confers a broad-spectrum  
368 resistance to *Fusarium* (Diener and Ausubel, 2005). Cluster C16 also included genes encoding  
369 LysM receptor-like kinases CERK1 and LYK5 (Cao et al., 2014), which are essential for the  
370 perception and transduction of the chitin oligosaccharide elicitor. Although not significantly  
371 enriched, 26 *RLP/RLK* genes grouped in cluster C15, including *FLG22-INDUCED RECEPTOR-*  
372 *LIKE KINASE1 (FRK1)* and *HERCULES RECEPTOR KINASE1 (HERK1)*, which are activated  
373 in response to both pathogenic and endophytic *F. oxysporum* strains.

374

### 375 ***NLR* genes**

376 Many plant NLRs are commonly identified as resistance proteins that act as surveillance  
377 molecules recognizing pathogen effectors that target the host machinery. In accordance with the  
378 so-called “guard” model, NLRs then trigger an ETI response (Cao et al., 2014). The Arabidopsis  
379 genome encodes 160 NLR proteins (Baggs et al., 2020), of which we identified 119 genes among  
380 our data set of DEGs (84 were assigned to clusters). Among these NLR genes, about 40%  
381 clustered across four immunity clusters, cluster C21 (18 genes), C16 (14 genes), C15 (11 genes),  
382 and C7 (4 genes), and were uniquely enriched in clusters 21 ( $p$ -value = 2.58e-07) and 16 ( $p$ -  
383 value = 6.82e-06), both of which include genes specifically repressed in the endophyte  
384 (Supplemental Data Set 15). The 11 NLR genes in cluster C15 included five known resistance  
385 genes (AT1G63880, AT1G61190, RPP4, RPP5, and RPP8) against oomycete and fungal  
386 pathogens (Goritschnig et al., 2012; McDowell et al., 2005; Staal et al., 2006; van der Biezen et  
387 al., 2002).

388

389 Notably, most of the *NLR* genes that were enriched in endophyte-suppressed clusters C16 and  
390 C21 are not functionally characterized. Nevertheless, characterized NLRs represented by genes  
391 in cluster C16 included two apoplast/chloroplast-localized ADP-binding immune receptors  
392 (ADR1-L1 and ADR1-L2) (Dong et al., 2016). Also belonging to cluster C16 were the two

393 effector-induced resistance genes *LAZARUS5* (*LAZ5*) and *HOPZ-ACTIVATED RESISTANCE1*  
394 (*ZARI*) (Barbacci et al., 2020; Baudin et al., 2017), conferring resistance to a *Pseudomonas*  
395 *syringae* strain expressing the AvrRPS4 and Hop effectors, respectively. *NLR* genes in cluster  
396 C21 included disease resistance proteins RPS3, RPS4, and RPS6, which provide specific  
397 resistance against *P. syringae* pv. *tomato* carrying the avirulence genes *AvrRPS3*, *AvrRPS4*, and  
398 *AvrRPS6*, respectively (Narusaka et al., 2009; Kim et al., 2009; Bisgrove et al., 1994).  
399 Repression of the expression of these *NLR* genes by the endophyte again supports the idea that  
400 the danger sensing and signaling systems underlying the responses to Fo47 and Fo5176 are  
401 distinct.

402

### 403 **Accessory chromosomes in two strains harbor genes induced during infection and with** 404 **distinct biological functions**

405 The distinct plant responses at both the phenotypic and transcriptome levels, resulting from  
406 inoculation with the two *F. oxysporum* isolates, is in no doubt related to genomic differences  
407 between the two strains. Even though both strains belong to the same species complex and share  
408 an ~46-Mb core genome, each strain also carries distinct accessory chromosomes (Figure 2). The  
409 Fo47 accessory chromosome 7 harbored 1,299 predicted genes (7.2% of total predicted genes)  
410 (Supplemental Data Set 16), 757 of which were expressed and 160 were strongly induced (false  
411 discovery rate (FDR) < 0.05) during one or more time points of the infection.

412

413 To explore the function of these accessory genes encoded in the endophytic strain Fo47, we next  
414 analyzed the functional domains they encoded. After excluding genes that encoded proteins with  
415 transposase-like domains or unknown domains, we highlighted five enriched PFAM domains:  
416 regulator of G-protein signaling domain (PF00615), nitric oxide (NO)-binding membrane sensor  
417 involved in signal transduction (PF03707), basic Leucine Zipper (bZIP) transcription factor  
418 (PF00170), chromodomain (PF00385), and bromodomain (PF00439) (Figure 6A, Supplementary  
419 Figure 5A). The enrichment of functional domains involved in cell signaling and the apparent  
420 lack of enrichment for domains related to virulence suggested that the Fo47 accessory  
421 chromosome contains genes with functions that are well suited to a nonpathogenic life style.  
422 Transcriptome analysis showed that nine Fo47 genes encoding proteins with the bacterial  
423 signaling protein domain (PF03707) are most highly induced at 24 and 48 HPI. Domain

424 PF03707 plays a role in sensing oxygen, carbon monoxide (CO), and NO (Galperin et al., 2001).  
425 The Fo47 genome has the highest number of genes encoding a PF03707 domain, with nine genes,  
426 compared to other filamentous fungi such as *Aspergillus nidulans* (1), *Neurospora crassa* (1),  
427 *Magnaporthe grisea* (1), *F. graminearum* (2), *F. verticillioides* (2), and *F. solani* (3) (Galagan et  
428 al., 2005; Cuomo et al., 2007; Dean et al., 2005, Ma et al., 2010), as well as other FOOSC  
429 members (3 ~ 7, average 4) (DeIulio et al., 2018). Notably, six of the nine genes reside on  
430 accessory chromosome 7, making it a major contributor to the expansion of this gene family  
431 within this strain (Supplemental Figure 6).

432  
433 By contrast, accessory chromosomes and regions from the pathogenic strain Fo5176 contributed  
434 4,136 predicted genes (23% of total predicted genes) (Supplemental Data Set 17), of which 3,502  
435 were expressed and 1,140 were strongly induced during one or more time points of the infection.  
436 Genes located in accessory regions in Fo5176 encoded proteins that were enriched for 42 PFAM  
437 domain terms. We noticed six PFAM domains that were highly enriched at different stages of the  
438 infection course and whose encoding genes were highly expressed: cysteine-rich secretory  
439 protein family (PF00188), Calpain family cysteine protease (PF00648), peptidase M16  
440 (PF16187), poly (ADP-ribose) polymerase regulatory domain (PF02877), cyclin C-terminal  
441 domain (PF02984), and WGR domain (PF05406) (Figure 6B, Supplementary Figure 5B). Most  
442 of these domains are likely associated with microbial pathogenesis or detoxification; their  
443 associated genes were induced during infection (Figure 6B). In particular, members of the  
444 cysteine-rich secretory protein (CAP) superfamily (PF00188) have a wide range of biological  
445 activities, including fungal virulence, cellular defense, and immune evasion (Schneiter and Di  
446 Pietro, 2013). For example, the *F. oxysporum* CAP family protein Fpr1 is a PR-1-like protein  
447 that is important for the virulence of strain Fo14287 (Prados-Rosales et al., 2012). The Fo5176  
448 genome encodes 15 CAP family members, significantly more than Fo47 and other comparable  
449 fungal species (average: 5 members) (Supplemental Figure 7). Phylogenetic analysis of CAP  
450 proteins showed that four CAP members formed a core group shared by Fo5176 and Fo47.  
451 However, a separate clade of six CAP family proteins was expanded in Fo5176 and encoded by  
452 Fo5176 accessory chromosomes (Supplemental Figure 7). These results highlight the distinctive  
453 functions of, and roles played by, accessory chromosomes in the nonpathogenic strain Fo47 and  
454 the pathogenic strain Fo5176. These differences might provide the mechanistic basis that allows

455 Fo47 to specialize in host sensing and benefit its host as an endophyte, while the pathogenic

456 Fo5176 specializes in host invasion and killing.

457

458



## 459 **DISCUSSION**

460 We performed a comparative study of infection by an endophytic (Fo47) and a pathogenic  
461 (Fo5176) strain of *F. oxysporum* in the context of the *F. oxysporum* Arabidopsis system, which  
462 revealed the transcriptional plasticity of plant defense responses. The pathosystem we developed  
463 combines the extensive knowledge of plant immunity in Arabidopsis and one of the most  
464 damaging fungal pathogens for agriculture, *F. oxysporum*. Strain-specific interactions with a  
465 common host are likely dictated by the accessory chromosomes from each *F. oxysporum* genome,  
466 which allows a comparative study that minimizes genetic differences between strains to address  
467 the underlying mechanism that results in distinct phenotypes (growth promotion or disease or  
468 even death). Up to 50% of crop losses in the USA can be attributed to soil-borne pathogens  
469 (Raaijmakers et al., 2009), and our results provide a foundation for the development of  
470 technologies to enhance plant health, sustain a healthy ecosystem, and feed a continuously  
471 growing human population.

472  
473 We employed comparative metatranscriptomics over the course of early infection to  
474 systematically capture temporal transcriptional changes in both the host and the interacting  
475 microbes. Our results may be summarized along four main axes, as illustrated in Figure 7.

476  
477 First, host transcriptional responses were strikingly similar at all time points, regardless of the  
478 obvious phenotypic differences seen after infection of Arabidopsis plants by Fo47 and Fo5176.  
479 Of all clusters of DEGs, cluster C15 exhibited a strong and early induction of genes, followed by  
480 a return to an expression level comparable to that of control samples. This cluster captured 26  
481 Arabidopsis *RLP/RLK* genes, as well as 269 PTI and 159 ETI response genes, suggesting that  
482 both strains initially elicit a similar MAMP response, which would not be surprising as they  
483 belong to the same species.

484  
485 Second, our data revealed rapid transcriptional reprogramming at the beginning of the  
486 interactions. While the majority of plant genes exhibited a common expression pattern during the  
487 two infections, a small subset of plant genes displayed divergent gene expression profiles. By far  
488 the most striking difference was observed at 12 HPI, when the GO biological processes for genes  
489 uniquely induced by Fo47 or Fo5176 reflected almost opposite responses. The endophytic strain

490 Fo47 stimulated nitrogen metabolism and suppressed host immunity, whereas the pathogenic  
491 strain Fo5176 stimulated host immune responses and toxin metabolism, but repressed functions  
492 related to plant growth and development. We propose that this distinct expression profile,  
493 reflected in the early divergence of the host transcriptome, is the result of plasticity of the host  
494 transcriptome when facing an endophyte or a pathogen. We hypothesize that the perception by  
495 the host of distinct fungal signals occurs shortly after inoculation and is followed by the rapid  
496 activation of downstream signaling cascades. Our results also stress the importance and necessity  
497 of sampling early during the establishment of a fungal–host interaction to better capture the full  
498 extent of the underlying temporal dynamics.

499

500 Third, Fo47 inoculation resulted in suppression of genes related to plant defense and induced  
501 genes related to plant growth, in agreement with the trade-off between growth and defense. It has  
502 been reported that plants can channel nitrogen resources towards production of defense-related  
503 compounds when confronted with pathogens (Ullmann-Zeunert et al., 2013). For instance, allele  
504 polymorphism at the single locus *ACCELERATED CELL DEATH6* (*ACD6*) can dictate distinct  
505 difference between growth and defense among different *Arabidopsis* ecotypes (Todesco et al.,  
506 2010). Further characterizing the *F. oxysporum*–*Arabidopsis* pathosystem should illuminate the  
507 mechanism(s) by which nutrients are allocated in relation to plant defense.

508

509 Finally, we observed an agreement between plant infection phenotypes and distinctive gene  
510 functions associated with fungal accessory chromosomes. While upregulated fungal accessory  
511 genes were primarily enriched in proteins with roles in cell signaling and nutrient transport in the  
512 endophyte Fo47, they were enriched for virulence and detoxification in the pathogen Fo5176,  
513 likely contributing to the contrasting phenotypes of plants infected by these two *F. oxysporum*  
514 strains.

515

516 In conclusion, time-resolved comparative metatranscriptomics can be used to characterize  
517 transcription regulation when the model plant *Arabidopsis* is challenged with an endophyte and a  
518 pathogen of the same fungal species. We showed both the conservation and plasticity of the plant  
519 and fungal transcriptomes and how they may relate to the distinctive genomic features associated  
520 with each fungal genome. The *Arabidopsis* and *F. oxysporum* pathosystem developed here is

521 likely to become an ideal system to characterize plant recognition and response mechanisms  
522 against soil-borne root fungi. We believe this system will be pivotal in enriching our  
523 understanding of the molecular mechanisms necessary to enhance vascular wilt resistance not  
524 only in Arabidopsis, but also in crops that are under threat by *F. oxysporum* pathogens.  
525  
526  
527

## 528 **METHODS**

### 529 **Plant and fungal growth**

530 *Fusarium oxysporum* strains Fo5176 and Fo47 were routinely cultured on potato dextrose agar  
531 (BD, New Jersey USA) at 28°C under a 12-h-light/12-h-dark photoperiod. Fungal spores were  
532 collected from 5-d-old cultures in potato dextrose broth (BD, New Jersey USA) by passing the  
533 liquid culture through a double layer of sterile cheesecloth, followed by centrifugation of the  
534 flow-through at 3,000 g for 15 min at room temperature. Fungal spores were mixed with an  
535 appropriate volume of sterile deionized water to prepare the spore suspension (concentration:  $1 \times$   
536  $10^6$  spores/mL) for infection assays.

537

### 538 **Plant infection assay**

539 Seeds of *Arabidopsis* (*Arabidopsis thaliana*) accession Columbia-0 (Col-0) were obtained from  
540 the *Arabidopsis* Biological Resource Center (ARBC, Ohio State University) and were surface  
541 sterilized in 1 mL of 70% (v/v) ethanol three times, 5 min each, followed by one wash with 50%  
542 (v/v) bleach for 5 min. After removing the bleach solution, seeds were rinsed with 1 mL of  
543 sterile distilled and deionized water, and stratified for 3–4 d in darkness at 4°C. Seeds were  
544 planted into pots filled with an autoclaved mixture of fine-grain play sand: MetroMix  
545 360:vermiculite in a 1:2:1 ratio, watered with distilled deionized water, and covered with a clear  
546 plastic lid to retain a high humidity for 3 d in the growth chamber with the following settings:  
547 24°C, 14 h light/10 h dark, and a light intensity (T8 fluorescent and incandescent bulbs) ranging  
548 from 89 to 94  $\mu\text{mol}\cdot\text{m}^{-2}\cdot\text{s}^{-1}$ . After 3 d, the plastic lid was removed, and seedlings were allowed  
549 to grow for 11 additional days prior to inoculation with *F. oxysporum* microconidia. Plants were  
550 14 d old at the time of inoculation and had at least four fully expanded true leaves. For *F.*  
551 *oxysporum* infection, the roots of 14-d-old *Arabidopsis* plants were dipped for 30 s in a  $1 \times 10^6$   
552 fungal spores/mL suspension of Fo5176 or Fo47, or in sterile dH<sub>2</sub>O for the mock control.  
553 Inoculated plants were planted in autoclaved potting mix and moved to a growth chamber set to  
554 28°C with the same photoperiod as above.

555

### 556 **RNA preparation, sequencing, and data analysis**

557 Roots from infected plants at 12, 24, 48, and 96 h post inoculation (HPI) were harvested from  
558 five plants per treatment and time point for total RNA isolation. For control samples, roots from

559 the same number of control plants were collected at 12 HPI. Fungal cultures from Fo5176 and  
560 Fo47 fungal mycelia were harvested after 5 d from liquid cultures for RNA extraction. Three  
561 biological replicates were produced for each treatment. Total RNA was extracted using the ZR  
562 Soil/Fecal RNA Microprep Kit (Zymo Research, CA, Cat. R2040) following the manufacturer's  
563 protocol, and the RNA quantity and quality were assessed using a NanoDrop 2000 and Agilent  
564 2100 Bioanalyzer. Illumina TruSeq stranded mRNA libraries were prepared and sequenced on an  
565 Illumina HiSeq2000 platform at the Broad Institute (Cambridge, MA). One replicate each for  
566 infected plant samples inoculated with Fo47 at 12 HPI and Fo5176 at 24 HPI failed, as did one  
567 replicate for Fo47 and Fo5176 mycelia samples; these four conditions are therefore only  
568 represented by two replicates and were used for downstream processing and analysis.

569  
570 Paired-end RNA-seq reads were first assessed for quality by FastQC 0.10.1 (Andrews, 2010).  
571 RNA-seq data were analyzed using the HISAT, StringTie, and DESeq2 pipelines (Pertea et al.,  
572 2016; Love et al., 2014). Briefly, reads were mapped to reference genomes of Arabidopsis  
573 (annotation version Araport11, (Cheng et al., 2017)), Fo5176 (Like Fokkens et al., 2020), and  
574 Fo47 (Wang et al., 2020a) using HISAT2/2.0.5 (Kim et al., 2015). Mapped reads were used to  
575 quantify the transcriptome by stringTie/1.3.4 (Pertea et al., 2015). Read count normalization and  
576 differential gene expression analysis were conducted using DESeq2/1.27.32 with a maximum  
577 FDR of 0.05 (Love et al., 2014). Corrplot/0.84 was used to visualize the correlation in gene  
578 expression profiles between different conditions. Read counts of differentially expressed genes  
579 (DEGs) were first averaged per condition and then normalized by log transformation as  
580  $\log_2(\text{normalized read count} + 1)$ , and then correlations were calculated. Clustering analysis on  
581 per-condition averaged, log-transformed, and Z-scaled read counts was performed using the K-  
582 means clustering algorithm 'Lloyd' (R function K-means) and then visualized in ggplot2/3.3.0.

583

#### 584 **Functional analysis and visualization**

585 GO enrichment analysis (plant GO slim) of Arabidopsis gene clusters and reciprocal DEG  
586 analysis were conducted with the singular enrichment analysis (SEA) tool of agriGO v2 (Du et  
587 al., 2010; Tian et al., 2017) using the Arabidopsis TAIR10 annotation. We applied a  
588 hypergeometric test, combined with Hochberg (FDR) multi-test adjustment method to discover  
589 enriched GO terms at a significance level of 0.01 with a minimum of three mapping entries.

590 Comparisons of different enrichment results were performed using cross-comparison of SEA  
591 (SEACOMPARE). We generated PFAM annotations for *F. oxysporum* 5176 and 47 by  
592 InterproScan, following a standard annotation pipeline (Jones et al., 2014). PFAM enrichment in  
593 proteins encoded by fungal genes was performed in TBtools (Chen et al., 2020) using Fisher's  
594 exact test with FDR < 0.05. We performed a custom analysis in Metascape (Zhou et al., 2019),  
595 with the options minimum overlap of 3, *p*-value cutoff of 0.01, and minimum enrichment of 1.5  
596 for the discovery of GO term enrichment and network visualization of Arabidopsis DEGs at 12  
597 HPI. The top five terms (with the smallest *p*-values) were selected, and the terms that shared the  
598 gene entries (forming edges) were visualized. The visualization was further polished in  
599 Cytoscape/3.8.0 (Shannon, 2003).

600

### 601 **Synteny and phylogenomic analysis**

602 Synteny was detected by Basic Local Alignment Search Tool for nucleotides (BLASTN), with  
603 parameters above 50 kb coverage and 98.5% sequence identity, and visualized as a Circos plot  
604 (Krzyszowski et al., 2009). *OrthoFinder* was used to identify orthologous pairs across compared  
605 genomes and to construct a genome-based phylogenetic tree. The divergence times between  
606 species were estimated using the PL method with r8s (Taylor and Berbee, 2006). CAFE  
607 (Computational Analysis of gene Family Evolution) v.3 (Han et al., 2013) was used to test  
608 whether protein family sizes were compatible with a stochastic birth and death model, and the  
609 Viterbi algorithm in the CAFE program was used to assign *p*-values to the  
610 expansions/contractions experienced at each branch and using a cutoff of  $p < 0.05$ .

611

### 612 **Accession Numbers**

613 RNA-seq data generated in this study were deposited in the NCBI Short Read Archive (SRA)  
614 with accession number GSE87352.

615

616 **Table 1. Genes that play important roles in danger sensing and signaling suppressed by the endophytic**  
 617 **interaction**  
 618

| Cluster                                                                                         | PRRs and downstream components | RLCKs       | MAP kinase cascades | NLRs and downstream signaling | SA biosynthesis and signaling |
|-------------------------------------------------------------------------------------------------|--------------------------------|-------------|---------------------|-------------------------------|-------------------------------|
| <b>C16</b><br>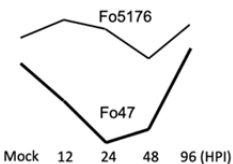 | <i>EFR</i>                     | <i>PBL1</i> | <i>MEKK1</i>        | <i>ADRI-L1</i>                | <i>CBP60g</i>                 |
|                                                                                                 | <i>BAK1</i>                    | <i>PBL2</i> | <i>MPK11</i>        | <i>ADRI-L2</i>                | <i>SARD1</i>                  |
|                                                                                                 | <i>LYK5</i>                    |             |                     | <i>LAZ5</i>                   |                               |
|                                                                                                 | <i>CERK1</i>                   |             |                     | <i>ZAR1</i>                   |                               |
|                                                                                                 | <i>SOBIR1</i>                  |             |                     |                               |                               |
| <b>C21</b><br> | <i>PEPR1</i>                   |             | <i>MPK3</i>         | <i>RPM1</i>                   | <i>CAMTA3</i>                 |
|                                                                                                 | <i>PEPR2</i>                   |             |                     | <i>PAD4</i>                   | <i>NPR1</i>                   |
|                                                                                                 | <i>FER</i>                     |             |                     | <i>RPP1</i>                   | <i>NPR3</i>                   |
|                                                                                                 | <i>RBOHD</i>                   |             |                     | <i>RPS4</i>                   |                               |
|                                                                                                 | <i>PERK1</i>                   |             |                     | <i>RPS3</i>                   |                               |
|                                                                                                 | <i>RFO1</i>                    |             |                     | <i>RPS6</i>                   |                               |
|                                                                                                 |                                |             |                     |                               |                               |
|                                                                                                 |                                |             |                     |                               |                               |

619 **Notes:**

620 1. Abbreviation of header: receptor-like cytoplasmic kinase [RCLK], mitogen-activated protein  
 621 [MAP], salicylic acid [SA],

622 2. Abbreviation of genes: *EF-TU RECEPTOR* [*EFR*], *BRI1-ASSOCIATED RECEPTOR*

623 *KINASE1* [*BAK1*], *LYSM-CONTAINING RECEPTOR-LIKE KINASE5* [*LYK5*], *CHITIN*

624 *ELICITOR RECEPTOR KINASE1* [*CERK1*], *PEP1 RECEPTOR* [*PEPR*], *FERONIA* [*FER*],

625 *RESPIRATORY BURST OXIDASE HOMOLOGUE D* [*RBOHD*], *AVRPPHB SUSCEPTIBLE1-*

626 *LIKE1* [*PBL1*], *PBL2*), *MAPK/ERK KINASE KINASE1* [*MEKK1*], *MAP KINASE11* [*MPK11*],

627 *ACTIVATED DISEASE RESISTANCE1-LIKE* [*ADRI-L*], *RESISTANCE TO P. SYRINGAE PV*

628 *MACULICOLA1* [*RPM1*], *PHYTOALEXIN DEFICIENT4* [*PAD4*], *RECOGNITION OF*

629 *PERONOSPORA PARASITICA1* [*RPP1*], *RESISTANT TO P. SYRINGAE4* [*RPS4*],

630 *CALMODULIN-BINDING PROTEIN 60-LIKE G* [*CBP60g*], *SA RESPONSE DEFICIENT1*

631 [*SARD1*], *CALMODULIN-BINDING TRANSCRIPTION ACTIVATOR3* [*CAMTA3*],

632 *NONEXPRESSER OF PATHOGENESIS-RELATED GENE* [*NPR*], *SUPPRESSOR OF BIR1*

633 [*SOBIR1*], *PROLINE-RICH EXTENSIN-LIKE RECEPTOR KINASE1* [*PERK1*], *RESISTANCE*

634 *TO FUSARIUM OXYSPOURUM1* [*RFO1*], *FLG22-INDUCED RECEPTOR-LIKE KINASE1*

635 [*FRK1*], and *HERCULES RECEPTOR KINASE1* [*HERK1*].

636

637

638

639 **Supplemental Data**

640 **Supplemental Figure 1.** Comparison of transposable elements number in core regions and  
641 accessory regions of Fo47 and Fo5176.

642 **Supplementary Figure 2.** Co-expression gene clusters.

643 **Supplemental Figure 3.** Reciprocal DEGs in endophyte or pathogen infected Arabidopsis plants  
644 at each time point.

645 **Supplemental Figure 4.** Expression pattern of key genetic components involved in nitrogen  
646 metabolism.

647 **Supplemental Figure 5.** Expression profiles of *in planta*-induced lineage-specific genes for  
648 Fo47 and Fo5176, carrying the PFAM domains enriched on fungal accessory chromosomes.

649 **Supplemental Figure 6.** Comparison of the PF03707 domain (regulator of G-protein signaling  
650 domain) between Fo47 and Fo5176, and among other filamentous fungi.

651 **Supplemental Figure 7.** Comparison of the PF00188 domain (cysteine-rich secretory protein  
652 (CAP) superfamily) between Fo47 and Fo5176, and among other filamentous fungi.

653 **Supplemental Figure 8.** Single-copy orthologs of Fo47 and Fo5176 display conservation and  
654 divergence of gene induction during plant infection compared to axenic control.

655 **Supplemental Data Set 1.** PFAM domain enrichment of genes located on accessory  
656 chromosomes in Fo47.

657 **Supplemental Data Set 2.** PFAM domain enrichment of genes located on accessory  
658 chromosomes in Fo5176.

659 **Supplemental Data Set 3.** Statistics and gene list of 24 co-expression gene clusters.

660 **Supplemental Data Set 4.** Host genes that are preferentially upregulated by Fo47 at 12 HPI.

661 **Supplemental Data Set 5.** Host genes that are preferentially downregulated by Fo47 at 12 HPI.

662 **Supplemental Data Set 6.** Host genes that are preferentially upregulated by Fo5176 at 12 HPI.

663 **Supplemental Data Set 7.** Host genes that are preferentially upregulated by Fo47 at 12 HPI.

664 **Supplemental Data Set 8.** Cluster assignment and annotation of nitrate response genes that were  
665 differentially expressed in our study.

666 **Supplemental Data Set 9.** Cluster assignment and annotation of transcription factors that  
667 control transcriptional regulation of nitrogen-associated metabolism and growth.

668 **Supplemental Data Set 10.** Overlap of PTI-responsive genes with immunity clusters.

669 **Supplemental Data Set 11.** Overlap of ETI-responsive genes with immunity clusters.



670 **Supplemental Data Set 12.** Genes within C15 that are annotated as encoding plastid-localized  
671 proteins.

672 **Supplemental Data Set 13.** Cluster assignment of the genes that are involved in immune  
673 signaling.

674 **Supplemental Data Set 14.** Cluster assignment and annotation of *RLP/RLK* genes that were  
675 differentially expressed in our study.

676 **Supplemental Data Set 15.** Cluster assignment and annotation of *NLR* genes that were  
677 differentially expressed in our study.

678 **Supplemental Data Set 16.** The 1,229 genes located on Fo47 accessory chromosomes and their  
679 expression at five selected stages.

680 **Supplemental Data Set 17.** The 4,136 genes located on Fo5176 accessory chromosomes and  
681 their expression at five selected stages.

682

### 683 **ACKNOWLEDGEMENTS**

684 The authors thank Dr. John Manners and Donald Gardiner of CSIRO for providing the strain  
685 Fo5176; Chris Joyner, the Superintendent of the College of Natural Sciences Greenhouse at  
686 University of Massachusetts, for his helps with all experiments conducted in the greenhouse; and  
687 Patrice Patrice Salomé for preparing the summary figure.

688

689 This project was supported by Natural Science Foundation of (IOS-165241), the National  
690 Research Initiative Competitive Grants Program Grant no. 2008-35604-18800 and MASR-2009-  
691 04374 and MAS00496 from the USDA National Institute of Food and Agriculture. Data were  
692 analyzed at the Massachusetts Green High Performance Computing Center (MGHPCC). LG is  
693 also supported by a China Postdoctoral Foundation Grant (2017 M623188), the National Natural  
694 Science Foundation of China (31701739) and the Fundamental Research Fund of Xi'an Jiaotong  
695 University (1191329155). L.-J.M. is also supported by an Investigator Award in Infectious  
696 Diseases and Pathogenesis by the Burroughs Wellcome Fund BWF-1014893, and the National  
697 Eye Institute of the National Institutes of Health under award number: R01EY030150. HLY is  
698 also supported by Lotta M. Crabtree Fellowship. The funding bodies played no role in the design  
699 of the study and collection, analysis, and interpretation of data and in writing of the manuscript.

700

## 701 AUTHOR CONTRIBUTIONS

702 Project design and oversight: LG, LJM; Providing fungal strains: CS, VE, HCK; Conducting  
703 experiments: LG, LZ, GD, AB, KV; data analysis: LG, HLY, HY, BW, LJM; Results  
704 interpretation: LG, HLY, LJM; Manuscript writing: LG, HLY, HCK, LJM; Manuscript revision:  
705 all authors; Provide funding: LG, LJM. All authors read and approved the manuscript.

706

## 707 Competing Financial Interests

708 The authors declare no competing financial interests.

709

## 710 Figure Legends

### 711 **Figure 1. Compatible versus incompatible Arabidopsis interaction with an endophytic** 712 **(Fo47) versus a pathogenic (Fo5176) *F. oxysporum* strain.**

- 713 A. *F. oxysporum* Fo5176 causes typical wilt symptoms on Arabidopsis Col-0 plants, while  
714 Fo47-infected and mock-inoculated plants with water do not exhibit any symptoms.  
715 Photographs were taken at 7 d post inoculation (DPI), and representative plants are  
716 shown.
- 717 B. Micrographs of Arabidopsis roots mock-inoculated with water or infected with Fo47 or  
718 Fo5176 at 5 DPI and stained with X-ARA to reveal *F. oxysporum* hyphae. Scale bar  
719 represents 1 mm.
- 720 C. Survival analysis assay illustrating the survival rates of Arabidopsis plants mock-  
721 inoculated with water or infected with Fo47 or Fo5176 at six time points, from 4 to 28  
722 DPI. Ninety plants were assayed per treatment.
- 723 D. Summary of shoot dry biomass of Arabidopsis plants mock-inoculated with water or  
724 infected with Fo47 or Fo5176 at 6 DPI. Statistical significance was determined by  
725 Kruskal–Wallis and Wilcoxon rank-sum tests. Asterisk indicates statistical significance at  
726  $p < 0.001$ . Thirty-six plants were assayed per treatment.

727

### 728 **Figure 2. Comparative genomics reveals unique sets of accessory chromosomes in *F.*** 729 ***oxysporum* Fo47 and Fo5176.**

730 Synteny of genome assemblies between *F. verticillioides* (*Fv*) and the two selected *F. oxysporum*  
731 strains. Track a: distribution of karyotypes of assembled chromosomes; track b, GC density;  
732 track c, density of transposable elements (TEs) calculated in 10-kb windows; track d, gene  
733 density, calculated in 100-kb windows. Track e shows syntenic blocks. Relationships are shown  
734 through linking syntenic block genes (gene number >10) in each genome pair. Core  
735 chromosomes can be identified through synteny between *Fv* and each *Fo* strains, whereas  
736 accessory chromosomes and regions show no or reduced synteny. Chromosomes 2, 14, and 18  
737 and large segments (size > 1 Mb) of chromosomes 4, 10, 11, 13, and 16 in Fo5176 and  
738 chromosome 7 in Fo47 show no synteny with the *Fv* genome and are thus identified as accessory  
739 regions, characterized by their high TE density and low gene density.

740

### 741 **Figure 3. Expression profiling of Arabidopsis roots inoculated with an endophytic versus a** 742 **pathogenic *F. oxysporum* strain.**

- 743 A. Extent of correlation between Arabidopsis differentially expressed genes (DEGs) in  
744 Fo47- and Fo5176-infected plants across the different time points at 12, 24, 48, and 96 h  
745 post inoculation (HPI). Correlation coefficients (converted to percentages) are scaled to  
746 the sizes and colors of the circles.
- 747 B. Gene Ontology (GO) enrichment of 24 gene clusters from K-means clustering of  
748 Arabidopsis DEGs. The color scale of the heatmap represents the significance level of  
749 GO enrichment for biological processes related to stimuli response and developmental  
750 processes, expressed as  $-\text{Log}_{10}(\text{false discovery rate [FDR]})$ . Four clusters, C7, C15, C16,  
751 and C21, highly enriched for stimuli responses and deprived of developmental regulation,  
752 are highlighted in red and defined as immunity clusters.  
753

754 **Figure 4. A summary of transcriptomic changes occurring at 12 HPI.**

755 GO enrichment analysis and visualization were performed on four datasets representing up- and  
756 down-regulation by Fo47 and Fo5176, respectively. Nodes represent the GO categories with  
757 enrichment, while edges exist when two GO categories share the same genes. The nodes labeled  
758 in the same color represent the GO terms that belong to a master term as labeled. The size of the  
759 nodes is scaled to the number of genes within each GO term in each figure section.

- 760 A. Pathogen suppression: Arabidopsis genes with expression when infected by Fo47 smaller  
761 than when infected by Fo5176 and when infected by water ( $47 < 5176$  and  $47 < \text{mock}$ )  
762 B. Pathogen induction:  $5176 > 47$  and  $5176 > \text{mock}$   
763 C. Endophyte suppression:  $47 < 5176$  and  $47 < \text{mock}$   
764 D. Endophyte induction:  $47 > 5176$  and  $47 > \text{mock}$   
765

766 **Figure 5. Expression and GO enrichment of immunity gene clusters.**

- 767 A. Expression profile of immunity gene clusters. Color scale indicates the correlation of  
768 expression between genes and the cluster centroids. Genes that were removed from the  
769 clusters before functional analysis due to the expression correlation with centroid lower  
770 than (or equal to) 0.8 are shown in gray. Enrichment of pathogen-associated molecular  
771 pattern-triggered immunity (PTI) and effector-triggered immunity (ETI) genes (defined  
772 by Dong et al. 2015) is indicated (in all labeled cases,  $P < 1E-7$ , by Fisher's exact test).  
773 Gene number within the four clusters is as follows: C7, 422; C15, 1,290; C16, 615; C21,  
774 766.
- 775 B. GO enrichment analysis of immunity gene clusters for biological processes, molecular  
776 functions, and cellular components. Color scale of the heatmap represents the FDR.  
777 Stimuli responses, developmental processes (overlapping with Figure 2C), and redundant  
778 GO terms were removed.  
779

780 **Figure 6. Distinct biological functions for induced AC genes in the endophyte Fo47 and the  
781 pathogen Fo5176.**

782 Fold enrichment refers to the ratio of the proportion of genes on the accessory  
783 chromosomes (ACs) with a specific term over the proportion of genes in the whole  
784 genome with a particular term (adjusted  $p$ -value  $< 0.05$ ).

- 785 A. Significantly induced Fo47 accessory genes are represented in five enriched PFAM  
786 domains, including regulator of G-protein signaling domain (PF00615), NO-binding  
787 membrane sensor involved in signal transduction (PF03707), bZIP transcription factor  
788 (PF00170), chromo domain (PF00385), and bromodomain (PF00439) containing

789 proteins.  
790 B. In Fo5176, six PFAM domains are significantly enriched and induced at different stages  
791 of infection course: cysteine-rich secretory protein family (PF00188), Calpain family  
792 cysteine protease (PF00648), peptidase M16 (PF16187), poly (ADP-ribose) polymerase  
793 regulatory domain (PF02877), cyclin C-terminal domain (PF02984), and WGR domain  
794 (PF05406).

795  
796 **Figure 7. Model of transcriptomic plasticity in beneficial and antagonistic plant–fungal**  
797 **interactions**

798 Molecular response of *Arabidopsis thaliana* plants challenged with an endophyte Fo47 and a  
799 pathogen Fo5176, two *Fusarium oxysporum* strains share a core genome of about 46 Mb, in  
800 addition to their unique accessory chromosomes. Distinct responding genes depict the  
801 transcriptional plasticity, as the pathogenic interaction activates plant stress responses and  
802 suppresses plant growth/development-related functions, while the endophyte attenuates host  
803 immunity but activates plant nitrogen assimilation. The differences in reprogramming of the  
804 plant transcriptome are linked to accessory genes encoded by the two closely related fungal  
805 genomes.

806  
807  
808  
809 **Supplemental Data**

810 **Supplemental Figure 1. Comparison of transposable element numbers in core regions and**  
811 **accessory regions of Fo47 (A) and Fo5176 (B).**

812 Bin size = 100 kb. t-tests were performed, and *p*-values are indicated.

813  
814 **Supplemental Figure 2. Co-expression gene clusters.**

815 Results of K-means clustering analysis, yielding 24 co-expression gene clusters. Color scale  
816 indicates the correlation of expression between genes and the cluster centroids. Genes  
817 that were removed from the clusters before further functional analysis due to the  
818 expression correlation with centroid lower than (or equal to) 0.8 are shown in gray. X  
819 axis, from left to right in each plot, dictate 96 HPI, 48 HPI, 24 HPI, 12 HPI (Fo47),  
820 Mock, 12 HPI, 24 HPI, 48 HPI, and 96 HPI (Fo5176).

821  
822 **Supplemental Figure 3. Reciprocal DEGs between endophyte- or pathogen-infected**  
823 **Arabidopsis plants at each time point.**

- 824 A. Diagram of the overall analysis.  
825 B. Reciprocal Arabidopsis DEGs in endophytic or pathogenic *F. oxysporum* infections at  
826 FDR < 0.05.  
827 C. Gene Ontology analysis (plant GO slim terms) of biological processes and molecular  
828 functions for preferentially expressed genes in Arabidopsis plants infected with Fo47 or  
829 Fo5176 at each time point. Color scale of the heatmap represents the FDR.

830  
831 **Supplemental Figure 4. Expression pattern of key components involved in nitrogen**  
832 **metabolism.**

833 Key components of the nitrogen metabolism pathway were extracted from the KEGG database;  
834 the corresponding gene expression profile is shown as a heatmap.

835  
836 **Supplemental Figure 5. Expression profiles of *in planta*-induced lineage-specific genes for**  
837 **Fo47 (A) and Fo5176 (B), encoding carrying the PFAM domains enriched on fungal**  
838 **accessory chromosomes.**

839  
840 **Supplemental Figure 6. Comparison of the PF03707 domain (regulator of G-protein**  
841 **signaling domain) between Fo47 and Fo5176, and other filamentous fungi**

842 A. Number of proteins with the PF03707 domain and number of genes encoding this  
843 domain.

844 B. Phylogenetic tree of proteins with the PF03707 domain in Fo47 and Fo5176.

845  
846 **Supplemental Figure 7. Comparison of the PF00188 domain (cysteine-rich secretory**  
847 **protein (CAP) superfamily) between Fo47 and Fo5176, and other filamentous fungi**

848 A. Number of proteins with the PF00188 domain and number of genes encoding this  
849 domain.

850 B. Phylogenetic tree of proteins with the PF00188 domain in Fo47 and Fo5176.

851  
852 **Supplementary Figure 8. Single-copy orthologs of Fo47 and Fo5176 display conservation**  
853 **of gene expression.**

854 There were 11,896 orthologs (1:1) between Fo47 and Fo5176. The Pearson correlation  
855 coefficient of Fo47 and Fo5176 ortholog expression is 0.73 (mycelia), 0.82 (12 HPI),  
856 0.72 (24 HPI), 0.88 (48 HPI), and 0.92 (96 HPI).

857

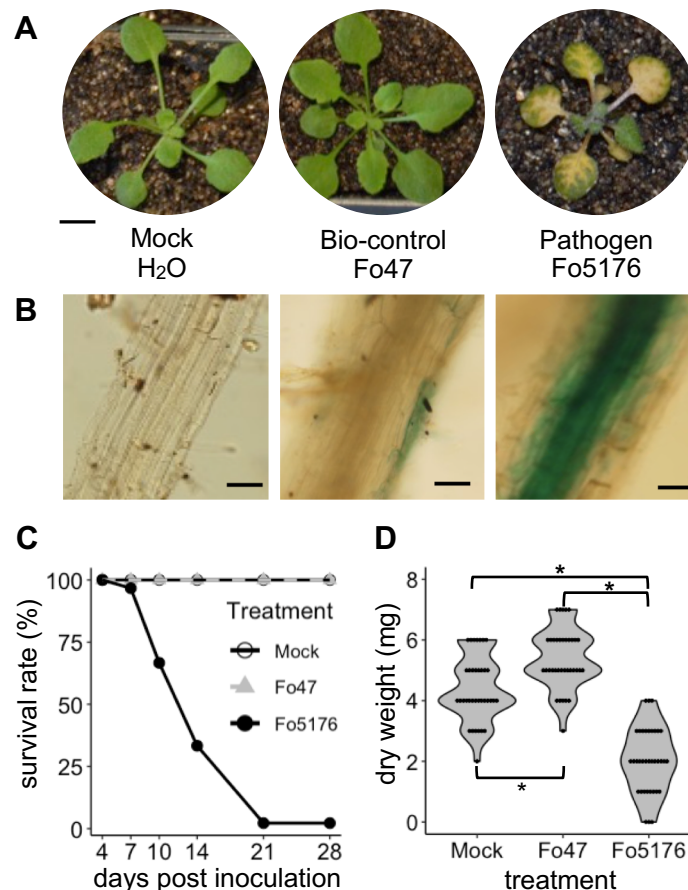

**Figure 1. Compatible vs. incompatible Arabidopsis interaction with an endophytic (Fo47) versus a pathogenic (Fo5176) *F. oxysporum* strain.**

- A. *F. oxysporum* Fo5176 causes typical wilt symptoms on Arabidopsis Col-0 plants, while Fo47-infected and mock-inoculated plants with water do not exhibit any symptoms. Photographs were taken at 6 d post inoculation (DPI), and representative plants are shown.
- B. Micrographs of Arabidopsis roots mock-inoculated with water or infected with Fo47 or Fo5176 at 5 DPI and stained with X-ARA to reveal *F. oxysporum* hyphae. Scale bar represents 1 mm.
- C. Survival analysis assay illustrating the survival rates of Arabidopsis plants mock-inoculated with water, or infected with Fo47 or Fo5176 at six time points, from 4 to 28 DPI. 90 plants were assayed per treatment.
- D. Summary of shoot dry biomass of Arabidopsis plants mock-inoculated with water, or infected with Fo47 or Fo5176 at 6 DPI. Statistical significance was determined by Kruskal–Wallis and Wilcoxon rank-sum tests. Asterisk indicates statistical significance at  $p < 0.001$ . 36 plants were assayed per treatment.

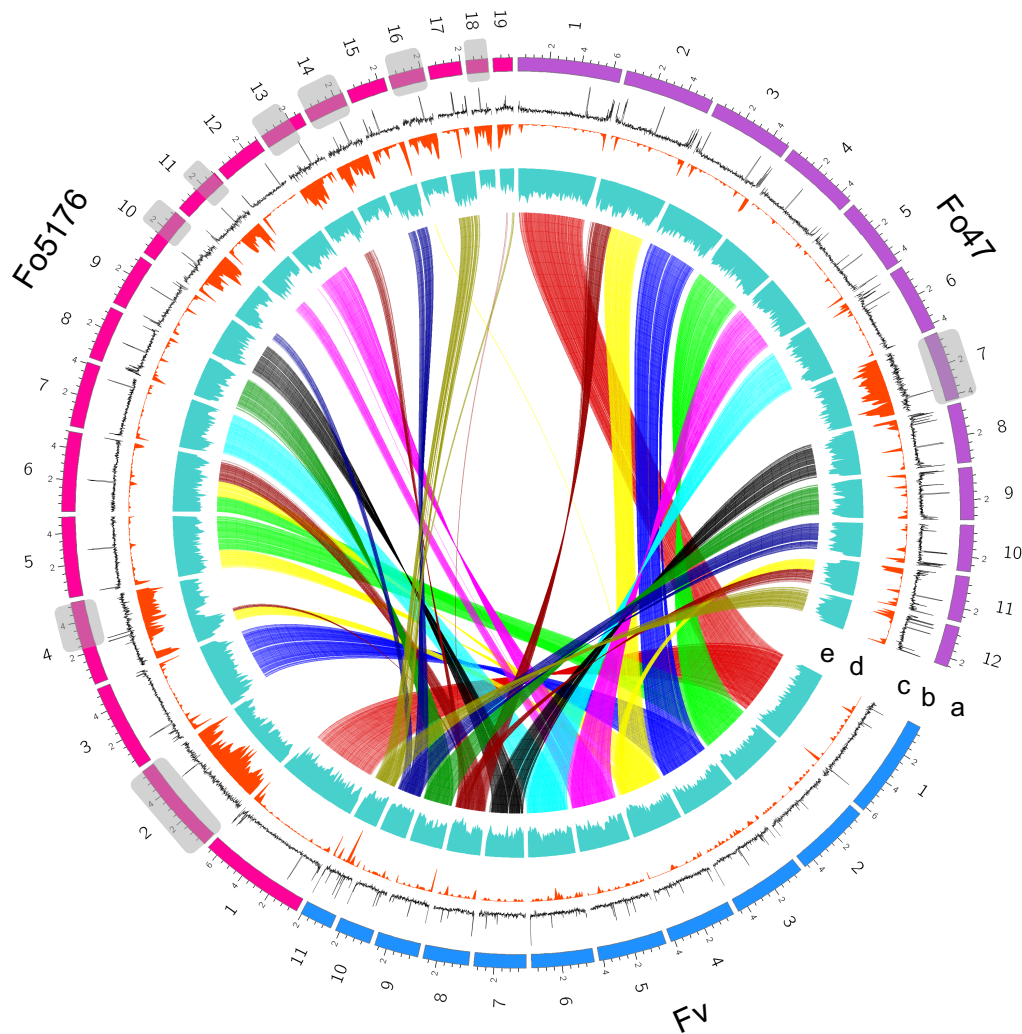

**Figure 2. Comparative genomics reveals unique sets of accessory chromosomes in *F. oxysporum* Fo47 and Fo5176, respectively.**

Synteny of genome assemblies between *F. verticillioides* (*Fv*) and the two selected *F. oxysporum* strains. Track a: distribution of karyotypes of assembled chromosomes; track b, GC density; track c, density of transposable elements (TEs) calculated in 10-kb windows; track d, gene density, calculated in 100-kb windows. Track e shows syntenic blocks. Relationships are shown through linking syntenic block genes (gene number >10) in each genome pair. Core chromosomes can be identified through synteny between *Fv* and each *Fo* strains, whereas accessory chromosomes and regions show no or reduced synteny. Chromosomes 2, 14, and 18 and large segments (size > 1 Mb) of chromosomes 4, 10, 11, 13, and 16 in Fo5176, and chromosome 7 in Fo47 show no synteny with the *Fv* genome and are thus identified as accessory regions, are characterized by their high TE density and low gene density.

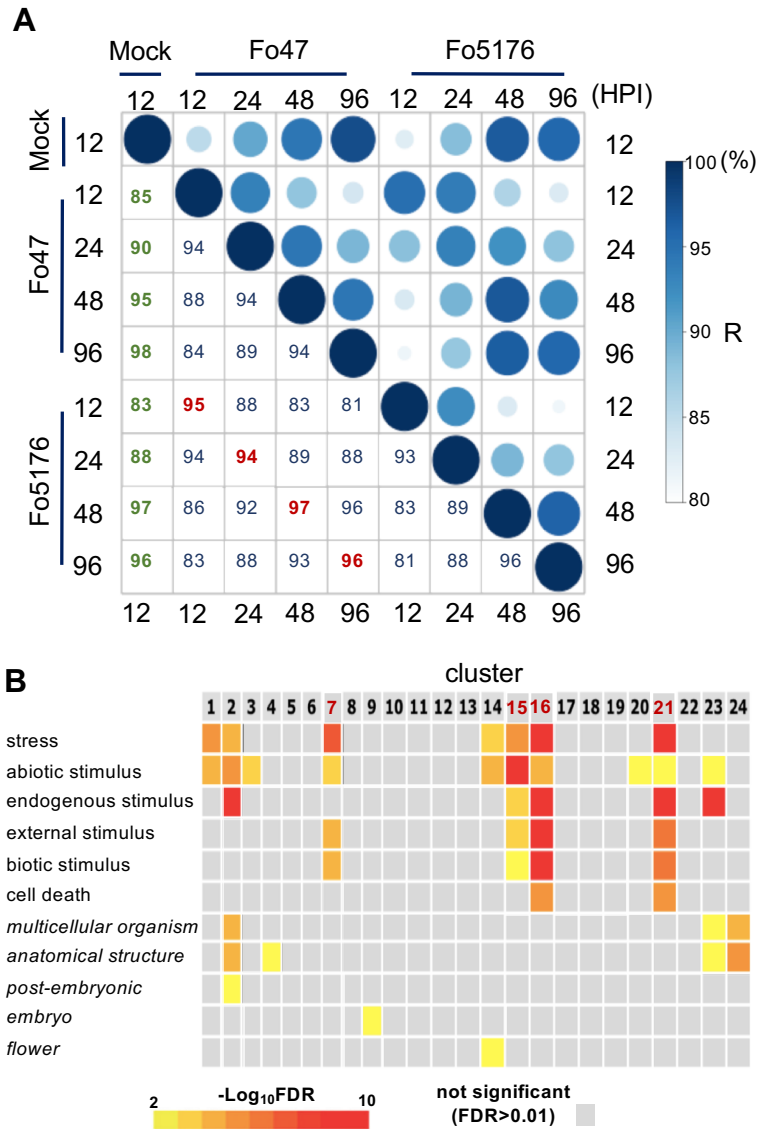

**Figure 3. Expression profiling of Arabidopsis roots inoculated with an endophytic versus a pathogenic *F. oxysporum* strain.**

- A. Extent of correlation between Arabidopsis differentially expressed genes (DEGs) in Fo47- and Fo5176- infected plants across the different time points at 12, 24, 48 and 96 h post inoculation (HPI). Correlation coefficients (converted to percentages) are scaled to the sizes and colors of the circles.
- B. Gene Ontology (GO) enrichment of 24 gene clusters from K-means clustering of Arabidopsis DEGs. The color scale of the heatmap represents the significance level of GO enrichment for biological processes related to stimuli response and developmental processes, expressed as  $-\text{Log}_{10}(\text{false discovery rate [FDR]})$ . Four clusters, C7, C15, C16, and C21, highly enriched for stimuli responses and deprived of developmental regulation, are highlighted in red and defined as immunity clusters.



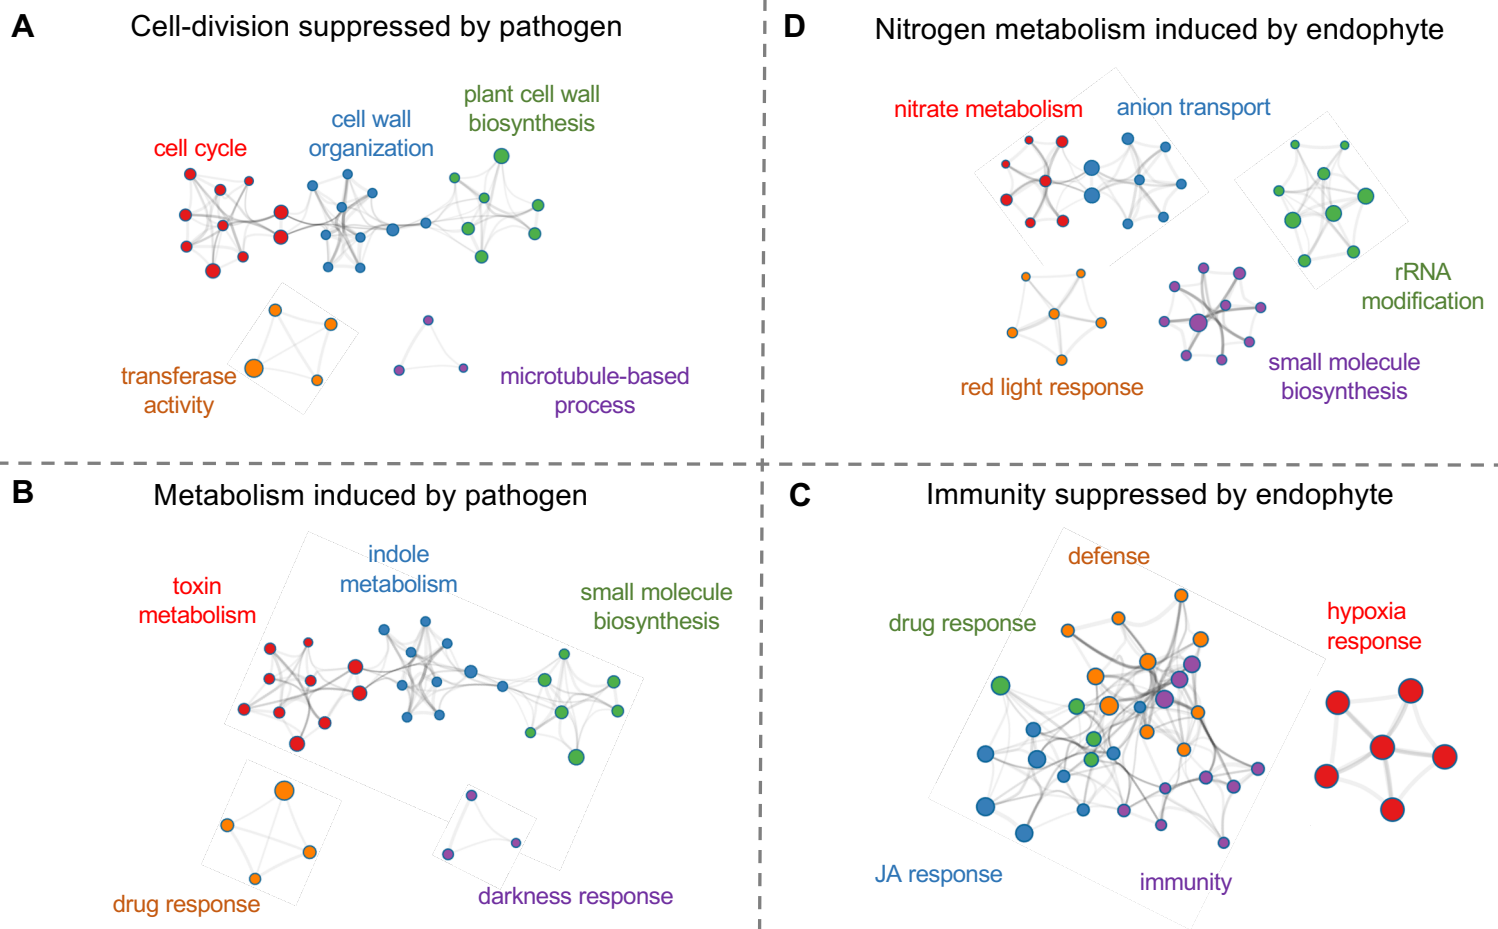

**Figure 4. A summary of transcriptomic changes occurring at 12 HPI.**

GO enrichment analysis and visualization were performed on four datasets representing up- and down-regulation by Fo47 and Fo5176 respectively. Nodes represent the GO categories with enrichment, while edges exist when two GO categories share the same genes. The nodes labeled in the same color represent the GO terms that belong to a master term as labeled. The size of the nodes is scaled to the number of genes within each GO terms in each figure section.

- A. Pathogen suppression: Arabidopsis genes with expression when infected by Fo47 smaller than when infected by Fo5176 and when infected by water ( $47 < 5176$  &  $47 < \text{mock}$ )
- B. Pathogen induction:  $5176 > 47$  &  $5176 > \text{mock}$
- C. Endophyte suppression:  $47 < 5176$  &  $47 < \text{mock}$
- D. Endophyte induction:  $47 > 5176$  &  $47 > \text{mock}$

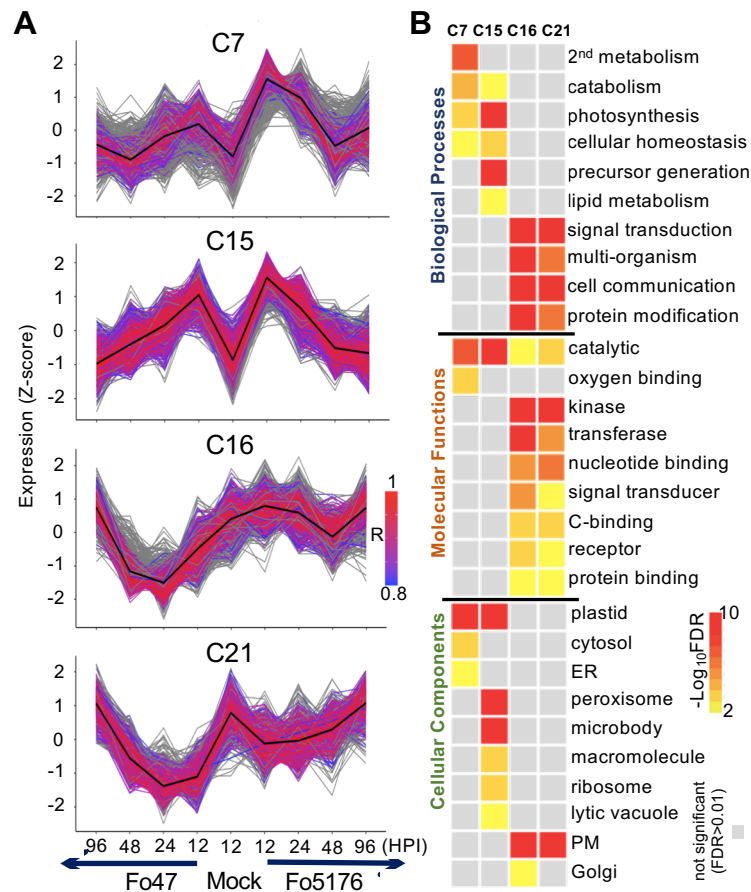

**Figure 5. Expression and GO enrichment of immunity gene clusters.**

- A. Expression profile of immunity gene clusters. Color scale indicates the correlation of expression between genes and the cluster centroids. Genes that were removed from the clusters before functional analysis due to the expression correlation with centroid lower than (or equal to) 0.8 are shown in gray. Enrichment of pathogen-associated molecular patterns-triggered immunity (PTI) and effector-triggered immunity (ETI) genes (defined by Dong et al. 2015) is indicated (in all labeled cases,  $P < 1E-7$ , by Fisher's exact test). Gene number within the four clusters is: C7, 422; C15, 1,290; C16, 615; C21, 766.
- B. GO enrichment analysis of immunity gene clusters for biological processes, molecular functions, and cellular components. Color scale of the heatmap represents the FDR. Stimuli responses, developmental processes (overlapping with Figure 2C) and redundant GO terms were removed.

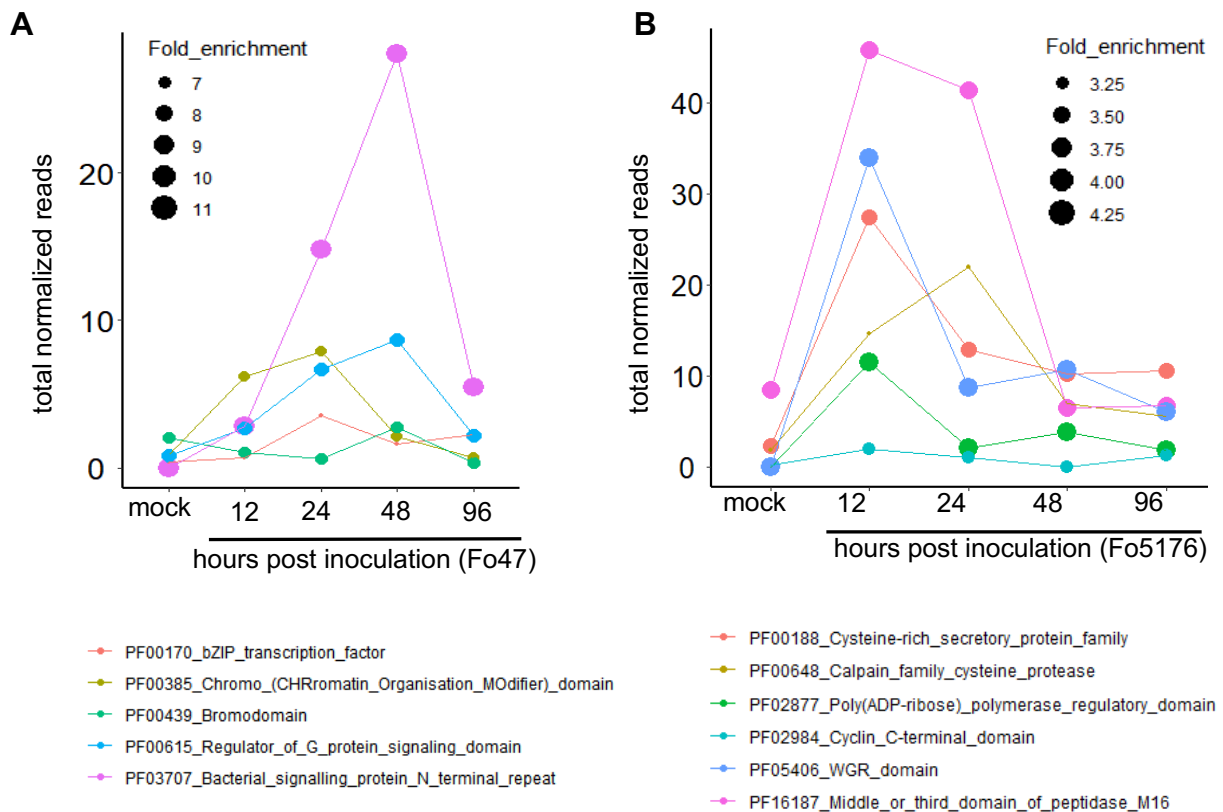

**Figure 6. Distinct biological functions for induced AC genes in the endophyte Fo47 and the pathogen Fo5176.**

Fold enrichment refers to the ratio of the proportion of genes on the accessory chromosomes (ACs) with a specific term over the proportion of genes in the whole genome with a particular term (adjusted p-value <0.05).

- A. Significantly induced Fo47 accessory genes are represented in 5 enriched PFAM domains, including regulator of G-protein signaling domain (PF00615), NO-binding membrane sensor involved in signal transduction (PF03707), bZIP transcription factor (PF00170), chromo domain (PF00385), and bromodomain (PF00439) containing proteins.
- B. In Fo5176, six PFAM domains are significantly enriched and induced at different stages of infection course: cysteine-rich secretory protein family (PF00188), Calpain family cysteine protease (PF00648), peptidase M16 (PF16187), poly (ADP-ribose) polymerase regulatory domain (PF02877), cyclin C-terminal domain (PF02984) and WGR domain (PF05406).

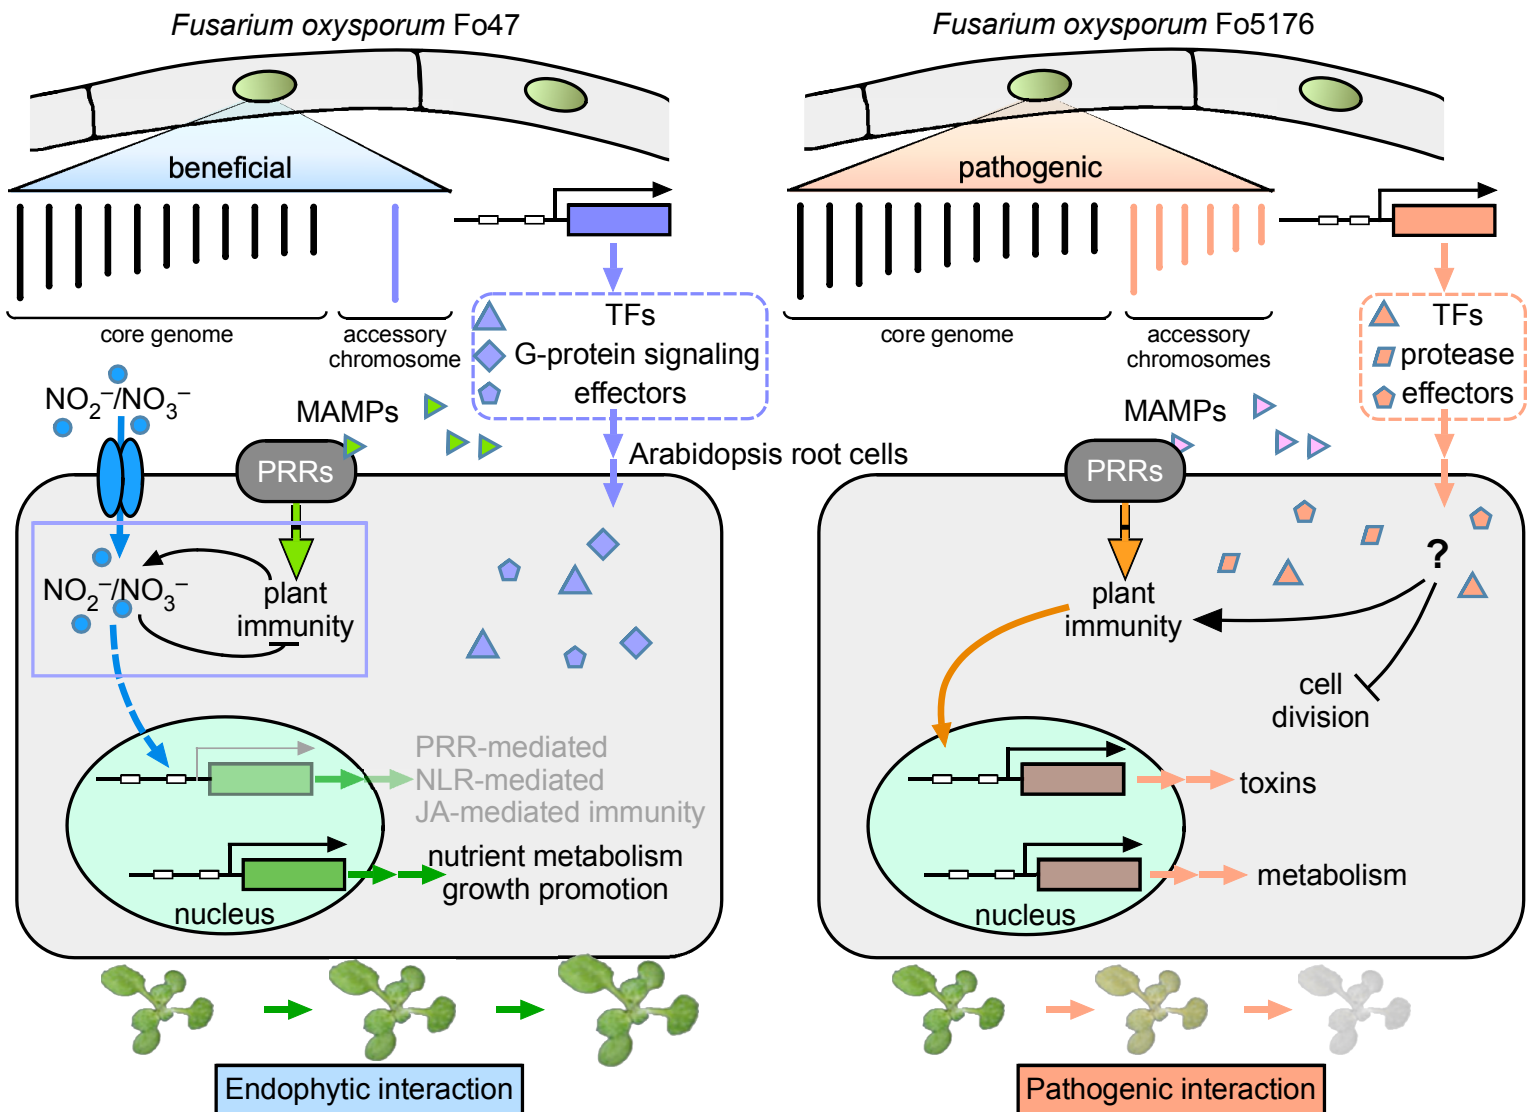

**Figure 7. Model of transcriptomic plasticity in beneficial and antagonistic plant-fungal interactions**

Molecular response of *Arabidopsis thaliana* plants challenged with an endophyte Fo47 and a pathogen Fo5176, two *Fusarium oxysporum* strains share a core genome of about 46 Mb, in addition to their unique accessory chromosomes. Distinct responding genes depict the transcriptional plasticity, as the pathogenic interaction activates plant stress responses and suppresses plant growth/development related functions; while the endophyte attenuates host immunity, but activates plant nitrogen assimilation. The differences in reprogramming of the plant transcriptome are linked to accessory genes encoded by the two closely related fungal genomes.

## Parsed Citations

**Aimé, S., Alabouvette, C., Steinberg, C., and Olivain, C. (2013).** The Endophytic Strain *Fusarium oxysporum* Fo47: A Good Candidate for Priming the Defense Responses in Tomato Roots. *MPMI* 26: 918–926.

Google Scholar: [Author Only](#) [Title Only](#) [Author and Title](#)

**Alabouvette, C. (1999).** *Fusarium* wilt suppressive soils: an example of disease-suppressive soils. *Austral. Plant Pathol.* 28: 57.

Google Scholar: [Author Only](#) [Title Only](#) [Author and Title](#)

**Andrews, S. (2010).** FastQC: A Quality Control Tool for High Throughput Sequence Data [Online]. Available online at: <http://www.bioinformatics.babraham.ac.uk/projects/fastqc/>

Google Scholar: [Author Only](#) [Title Only](#) [Author and Title](#)

**Armitage, A.D., Taylor, A., Sobczyk, M.K., Baxter, L., Greenfield, B.P.J., Bates, H.J., Wilson, F., Jackson, A.C., Ott, S., Harrison, R.J., and Clarkson, J.P. (2018).** Characterisation of pathogen-specific regions and novel effector candidates in *Fusarium oxysporum* f. sp. *cepae*. *Sci Rep* 8: 13530.

Google Scholar: [Author Only](#) [Title Only](#) [Author and Title](#)

**Asai, T., Tena, G., Plotnikova, J., Willmann, M.R., Chiu, W.-L., Gomez-Gomez, L., Boller, T., Ausubel, F.M., and Sheen, J. (2002).** MAP kinase signalling cascade in *Arabidopsis* innate immunity. *Nature* 415: 977–983.

Google Scholar: [Author Only](#) [Title Only](#) [Author and Title](#)

**Baggs, E.L., Monroe, J.G., Thanki, A.S., O'Grady, R., Schudoma, C., Haerty, W., and Krasileva, K.V. (2020).** Convergent Loss of an EDS1/PAD4 Signaling Pathway in Several Plant Lineages Reveals Coevolved Components of Plant Immunity and Drought Response. *Plant Cell* 32: 2158.

Google Scholar: [Author Only](#) [Title Only](#) [Author and Title](#)

**Baetsen-Young, A., Man Wai, C., VanBuren, R., and Day, B. (2020).** *Fusarium* virguliform Transcriptional Plasticity Is Revealed by Host Colonization of Maize versus Soybean. *Plant Cell* 32: 336–351.

Google Scholar: [Author Only](#) [Title Only](#) [Author and Title](#)

**Barbacci, A., Navaud, O., Mbengue, M., Barascud, M., Godiard, L., Khafif, M., Lacaze, A., and Raffaele, S. (2020).** Rapid identification of an *Arabidopsis* NLR gene as a candidate conferring susceptibility to *Sclerotinia sclerotiorum* using time-resolved automated phenotyping. *Plant J* 103: 903–917.

Google Scholar: [Author Only](#) [Title Only](#) [Author and Title](#)

**Baudin, M., Hassan, J.A., Schreiber, K.J., and Lewis, J.D. (2017).** Analysis of the ZAR1 Immune Complex Reveals Determinants for Immunity and Molecular Interactions. *Plant Physiol.* 174: 2038–2053.

Google Scholar: [Author Only](#) [Title Only](#) [Author and Title](#)

**Benhamou, N. and Garand, C. (2001).** Cytological Analysis of Defense-Related Mechanisms Induced in Pea Root Tissues in Response to Colonization by Nonpathogenic *Fusarium oxysporum* Fo47. *Phytopathology*® 91: 730–740.

Google Scholar: [Author Only](#) [Title Only](#) [Author and Title](#)

**Benhamou, N., Garand, C., and Goulet, A. (2002).** Ability of Nonpathogenic *Fusarium oxysporum* Strain Fo47 To Induce Resistance against *Pythium ultimum* Infection in Cucumber. *AEM* 68: 4044–4060.

Google Scholar: [Author Only](#) [Title Only](#) [Author and Title](#)

**Bigeard, J., Colcombet, J., and Hirt, H. (2015).** Signaling Mechanisms in Pattern-Triggered Immunity (PTI). *Molecular Plant* 8: 521–539.

Google Scholar: [Author Only](#) [Title Only](#) [Author and Title](#)

**Bozsoki, Z. et al. (2020).** Ligand-recognizing motifs in plant LysM receptors are major determinants of specificity. *Science* 369:663–670

Google Scholar: [Author Only](#) [Title Only](#) [Author and Title](#)

**Bisgrove, S. R., Simonich, M. T., Smith, N. M., Sattler, A., & Innes, R. W. (1994).** A disease resistance gene in *Arabidopsis* with specificity for two different pathogen avirulence genes. *The Plant cell*, 6(7): 927–933.

Google Scholar: [Author Only](#) [Title Only](#) [Author and Title](#)

**van der Burgh, A.M. and Joosten, M.H.A.J. (2019).** Plant Immunity: Thinking Outside and Inside the Box. *Trends in Plant Science* 24: 587–601.

Google Scholar: [Author Only](#) [Title Only](#) [Author and Title](#)

**Camera, S.L., Balagué, C., Göbel, C., Geoffroy, P., Legrand, M., Feussner, I., Roby, D., and Heitz, T. (2009).** The *Arabidopsis* Patatin-Like Protein 2 (PLP2) Plays an Essential Role in Cell Death Execution and Differentially Affects Biosynthesis of Oxylipins and Resistance to Pathogens. *MPMI* 22: 469–481.

Google Scholar: [Author Only](#) [Title Only](#) [Author and Title](#)

**Cao, Y., Liang, Y., Tanaka, K., Nguyen, C.T., Jedrzejczak, R.P., Joachimiak, A., and Stacey, G. (2014).** The kinase LYK5 is a major

chitin receptor in *Arabidopsis* and forms a chitin-induced complex with related kinase CERK1. *eLife* 3: e03766.

Google Scholar: [Author Only](#) [Title Only](#) [Author and Title](#)

Chen, C., Chen, H., Zhang, Y., Thomas, H.R., Frank, M.H., He, Y., and Xia, R. (2020). TBtools: An Integrative Toolkit Developed for Interactive Analyses of Big Biological Data. *Molecular Plant* 13: 1194–1202.

Google Scholar: [Author Only](#) [Title Only](#) [Author and Title](#)

Cesari, S. (2018). Multiple strategies for pathogen perception by plant immune receptors. *New Phytol* 219: 17–24.

Google Scholar: [Author Only](#) [Title Only](#) [Author and Title](#)

Chan, K.X., Mabbitt, P.D., Phua, S.Y., Mueller, J.W., Nisar, N., Gigolashvili, T., Stroehrer, E., Grassl, J., Arlt, W., Estavillo, G.M., Jackson, C.J., and Pogson, B.J. Sensing and signaling of oxidative stress in chloroplasts by inactivation of the SAL1 phosphoadenosine phosphatase. *PLANT BIOLOGY*: 10.

Chen, Y.C., Wong, C.L., Muzzi, F., Vlaardingerbroek, I., Kidd, B.N., and Schenk, P.M. (2015). Root defense analysis against *Fusarium oxysporum* reveals new regulators to confer resistance. *Sci Rep* 4: 5584.

Google Scholar: [Author Only](#) [Title Only](#) [Author and Title](#)

Cui, H., Tsuda, K., and Parker, J.E. (2015). Effector-Triggered Immunity: From Pathogen Perception to Robust Defense. *Annu. Rev. Plant Biol.* 66: 487–511.

Google Scholar: [Author Only](#) [Title Only](#) [Author and Title](#)

Cuomo, C.A. et al. (2007). The *Fusarium graminearum* Genome Reveals a Link Between Localized Polymorphism and Pathogen Specialization. *Science* 317: 1400–1402.

Google Scholar: [Author Only](#) [Title Only](#) [Author and Title](#)

van Dam, P., Fokkens, L., Schmidt, S.M., Linmans, J.H.J., Kistler, H.C., Ma, L.-J., and Rep, M. (2016). Effector profiles distinguish formae speciales of *Fusarium oxysporum*: Effector profiles distinguish Formae speciales of Fo. *Environ Microbiol* 18: 4087–4102.

Google Scholar: [Author Only](#) [Title Only](#) [Author and Title](#)

Dean, R., Van Kan, J.A.L., Pretorius, Z.A., Hammond-Kosack, K.E., Di Pietro, A., Spanu, P.D., Rudd, J.J., Dickman, M., Kahmann, R., Ellis, J., and Foster, G.D. (2012). The Top 10 fungal pathogens in molecular plant pathology: Top 10 fungal pathogens. *Molecular Plant Pathology* 13: 414–430.

Google Scholar: [Author Only](#) [Title Only](#) [Author and Title](#)

Dean, R.A. et al. (2005). The genome sequence of the rice blast fungus *Magnaporthe grisea*. *Nature* 434: 980–986.

Google Scholar: [Author Only](#) [Title Only](#) [Author and Title](#)

Delulio, G.A., Guo, L., Zhang, Y., Goldberg, J.M., Kistler, H.C., and Ma, L.-J. (2018). Kinome Expansion in the *Fusarium oxysporum* Species Complex Driven by Accessory Chromosomes. *mSphere* 3: e00231-18

Google Scholar: [Author Only](#) [Title Only](#) [Author and Title](#)

Diener, A. (2012). Visualizing and Quantifying *Fusarium oxysporum* in the Plant Host. *MPMI* 25: 1531–1541.

Google Scholar: [Author Only](#) [Title Only](#) [Author and Title](#)

Diener, A.C. and Ausubel, F.M. (2005). RESISTANCE TO FUSARIUM OXYSPORUM 1, a Dominant *Arabidopsis* Disease-Resistance Gene, Is Not Race Specific. *Genetics* 171: 305–321.

Google Scholar: [Author Only](#) [Title Only](#) [Author and Title](#)

Dodds, P.N. and Rathjen, J.P. (2010). Plant immunity: towards an integrated view of plant–pathogen interactions. *Nat Rev Genet* 11: 539–548.

Google Scholar: [Author Only](#) [Title Only](#) [Author and Title](#)

Dong, O.X., Tong, M., Bonardi, V., El Kasmí, F., Woloshen, V., Wünsch, L.K., Dangl, J.L., and Li, X. (2016). TNL-mediated immunity in *Arabidopsis* requires complex regulation of the redundant ADR1 gene family. *New Phytol* 210: 960–973.

Google Scholar: [Author Only](#) [Title Only](#) [Author and Title](#)

Dong, S., Raffaele, S., Kamoun, S. (2015). The two-speed genomes of filamentous pathogens: waltz with plants. *Current Opinion in Genetics & Development* 35: 57–65

Google Scholar: [Author Only](#) [Title Only](#) [Author and Title](#)

Dong, X., Jiang, Z., Peng, Y.-L., and Zhang, Z. (2015). Revealing Shared and Distinct Gene Network Organization in *Arabidopsis* Immune Responses by Integrative Analysis. *Plant Physiol.* 167: 1186–1203.

Google Scholar: [Author Only](#) [Title Only](#) [Author and Title](#)

Fokkens L., Guo L., Dora S., Wang B., Ye K., Sánchez-Rodríguez C. and Croll D. (2020) A chromosome-scale genome assembly for the *Fusarium oxysporum* strain Fo5176 to establish a model *Arabidopsis*-fungal pathosystem. *G3: Genes, Genomes, Genetics*. 10:10, p.3549-3555

Google Scholar: [Author Only](#) [Title Only](#) [Author and Title](#)

Fuchs, R., Kopischke, M., Klapprodt, C., Hause, G., Meyer, A.J., Schwarzländer, M., Fricker, M.D., and Lipka, V. (2016). Immobilized

**Subpopulations of Leaf Epidermal Mitochondria Mediate PENETRATION2-Dependent Pathogen Entry Control in Arabidopsis.** *Plant Cell* 28: 130–145.

Google Scholar: [Author Only](#) [Title Only](#) [Author and Title](#)

**Galagan, J.E. et al. (2005).** Sequencing of *Aspergillus nidulans* and comparative analysis with *A. fumigatus* and *A. oryzae*. *Nature* 438: 1105–1115.

Google Scholar: [Author Only](#) [Title Only](#) [Author and Title](#)

**Galazka, J.M. and Freitag, M. (2014).** Variability of chromosome structure in pathogenic fungi-of 'ends and odds.' *Current Opinion in Microbiology* 20: 19–26.

Google Scholar: [Author Only](#) [Title Only](#) [Author and Title](#)

**Galperin, M.Y., Gaidenko, T.A., Mulikidjanian, A.Y., Nakano, M., and Price, C.W. (2001).** MHYT, a new integral membrane sensor domain. *FEMS Microbiology Letters*: 7.

Google Scholar: [Author Only](#) [Title Only](#) [Author and Title](#)

**Göhre, V., Jones, A.M.E., Sklenář, J., Robatzek, S., and Weber, A.P.M. (2012).** Molecular Crosstalk Between PAMP-Triggered Immunity and Photosynthesis. *MPMI* 25: 1083–1092.

Google Scholar: [Author Only](#) [Title Only](#) [Author and Title](#)

**Goritschnig, S., Krasileva, K.V., Dahlbeck, D., and Staskawicz, B.J. (2012).** Computational Prediction and Molecular Characterization of an Oomycete Effector and the Cognate Arabidopsis Resistance Gene. *PLoS Genet* 8: e1002502.

Google Scholar: [Author Only](#) [Title Only](#) [Author and Title](#)

**Han, M.V., Thomas, G.W.C., Lugo-Martinez, J., and Hahn, M.W. (2013).** Estimating Gene Gain and Loss Rates in the Presence of Error in Genome Assembly and Annotation Using CAFE 30(8):1987-1997.

Google Scholar: [Author Only](#) [Title Only](#) [Author and Title](#)

**Hane, J.K., Rouxel, T., Howlett, B.J., Kema, G.H., Goodwin, S.B., and Oliver, R.P. (2011).** A novel mode of chromosomal evolution peculiar to filamentous Ascomycete fungi. *Genome Biol* 12: R45.

Google Scholar: [Author Only](#) [Title Only](#) [Author and Title](#)

**Jin, J., Tian, F., Yang, D.-C., Meng, Y.-Q., Kong, L., Luo, J., and Gao, G. (2017).** PlantTFDB 4.0: toward a central hub for transcription factors and regulatory interactions in plants. *Nucleic Acids Res* 45: D1040–D1045.

Google Scholar: [Author Only](#) [Title Only](#) [Author and Title](#)

**Jones, J.D.G. and Dangl, J.L. (2006).** The plant immune system. *Nature* 444: 323–329.

Google Scholar: [Author Only](#) [Title Only](#) [Author and Title](#)

**Jones, P. et al. (2014).** InterProScan 5: genome-scale protein function classification. *Bioinformatics* 30: 1236–1240.

Google Scholar: [Author Only](#) [Title Only](#) [Author and Title](#)

**Krzywinski, M., Schein, J., Gascoyne, R., Horsman, D., Jones, S.J., and Marra, M.A. (2009)** Circos: An information aesthetic for comparative genomics. *19(9)*: 1639–1645

Google Scholar: [Author Only](#) [Title Only](#) [Author and Title](#)

**Kim, S.H., Kwon, S.I., Saha, D., Anyanwu, N.C., and Gassmann, W. (2009).** Resistance to the *Pseudomonas syringae* Effector HopA1 Is Governed by the TIR-NBS-LRR Protein RPS6 and Is Enhanced by Mutations in SRFR1. *Plant Physiol.* 150: 1723–1732.

Google Scholar: [Author Only](#) [Title Only](#) [Author and Title](#)

**La Camera, S., Geoffroy, P., Samaha, H., Ndiaye, A., Rahim, G., Legrand, M., and Heitz, T. (2005).** A pathogen-inducible patatin-like lipid acyl hydrolase facilitates fungal and bacterial host colonization in Arabidopsis: A patatin favors infection in Arabidopsis. *The Plant Journal* 44: 810–825.

Google Scholar: [Author Only](#) [Title Only](#) [Author and Title](#)

**Lamp, N., Alkan, N., Davydov, O., and Fluhr, R. (2013).** Set-point control of RD21 protease activity by AtSerp1 controls cell death in Arabidopsis. *Plant J* 74: 498–510.

Google Scholar: [Author Only](#) [Title Only](#) [Author and Title](#)

**Li, J., Brader, G., and Palva, E.T. (2008).** Kunitz Trypsin Inhibitor: An Antagonist of Cell Death Triggered by Phytopathogens and Fumonisin B1 in Arabidopsis. *Molecular Plant* 1: 482–495.

Google Scholar: [Author Only](#) [Title Only](#) [Author and Title](#)

**Liu, K. et al. (2017).** Discovery of nitrate–CPK–NLP signalling in central nutrient–growth networks. *Nature* 545: 311–316.

Google Scholar: [Author Only](#) [Title Only](#) [Author and Title](#)

**Liu, J.-X. and Howell, S.H. (2010).** bZIP28 and NF-Y Transcription Factors Are Activated by ER Stress and Assemble into a Transcriptional Complex to Regulate Stress Response Genes in Arabidopsis. *Plant Cell* 22: 782–796.

Google Scholar: [Author Only](#) [Title Only](#) [Author and Title](#)

**Liu, Y. (2016).** Chloroplast in Plant-Virus Interaction. *Frontiers in Microbiology* 7: 20.

Google Scholar: [Author Only](#) [Title Only](#) [Author and Title](#)

Lyons, R., Stiller, J., Powell, J., Rusu, A., Manners, J.M., and Kazan, K. (2015). *Fusarium oxysporum* Triggers Tissue-Specific Transcriptional Reprogramming in *Arabidopsis thaliana*. *PLoS ONE* 10: e0121902.

Google Scholar: [Author Only](#) [Title Only](#) [Author and Title](#)

Ma, L.-J. et al. (2010). Comparative genomics reveals mobile pathogenicity chromosomes in *Fusarium*. *Nature* 464: 367–373.

Google Scholar: [Author Only](#) [Title Only](#) [Author and Title](#)

Ma, L.-J., Geiser, D.M., Proctor, R.H., Rooney, A.P., O'Donnell, K., Trail, F., Gardiner, D.M., Manners, J.M., and Kazan, K. (2013). *Fusarium* Pathogenomics. *Annu. Rev. Microbiol.* 67: 399–416.

Google Scholar: [Author Only](#) [Title Only](#) [Author and Title](#)

McDowell, J.M., Williams, S.G., Funderburg, N.T., Eulgem, T., and Dangl, J.L. (2005). Genetic Analysis of Developmentally Regulated Resistance to Downy Mildew (*Hyaloperonospora parasitica*) in *Arabidopsis thaliana*. *MPMI* 18: 1226–1234.

Google Scholar: [Author Only](#) [Title Only](#) [Author and Title](#)

Medina-Puche, L., Tan, H., Dogra, V., Wu, M., Rosas-Diaz, T., Wang, L., Ding, X., Zhang, D., Fu, X., Kim, C., and Lozano-Duran, R. (2020). A Defense Pathway Linking Plasma Membrane and Chloroplasts and Co-opted by Pathogens. *Cell* 182: 1109-1124.e25.

Google Scholar: [Author Only](#) [Title Only](#) [Author and Title](#)

Monteiro, F. and Nishimura, M.T. (2018). Structural, Functional, and Genomic Diversity of Plant NLR Proteins: An Evolved Resource for Rational Engineering of Plant Immunity. *Annu. Rev. Phytopathol.* 56: 243–267.

Google Scholar: [Author Only](#) [Title Only](#) [Author and Title](#)

Narusaka, M., Shirasu, K., Noutoshi, Y., Kubo, Y., Shiraishi, T., Iwabuchi, M., and Narusaka, Y. (2009). RRS1 and RPS4 provide a dual Resistance- gene system against fungal and bacterial pathogens. *The Plant Journal* 60: 218–226.

Google Scholar: [Author Only](#) [Title Only](#) [Author and Title](#)

Noël, L., Moores, T.L., Parker, J.E., and Jones, J.D.G. (1999) Pronounced Intraspecific Haplotype Divergence at the RPP5 Complex Disease Resistance Locus of *Arabidopsis*. *The Plant Cell* 11: 2099-2111.

Google Scholar: [Author Only](#) [Title Only](#) [Author and Title](#)

Olivain, C., Humbert, C., Nahalkova, J., Fatehi, J., L'Haridon, F., and Alabouvette, C. (2006). Colonization of Tomato Root by Pathogenic and Nonpathogenic *Fusarium oxysporum* Strains Inoculated Together and Separately into the Soil. *AEM* 72: 1523–1531.

Google Scholar: [Author Only](#) [Title Only](#) [Author and Title](#)

Parker, J. E., Coleman, M. J., Szabó, V., Frost, L. N., Schmidt, R., van der Biezen, E. A., Moores, T., Dean, C., Daniels, M. J., & Jones, J. D. (1997). The *Arabidopsis* downy mildew resistance gene RPP5 shares similarity to the toll and interleukin-1 receptors with N and L6. *The Plant cell*, 9(6), 879–894. <https://doi.org/10.1105/tpc.9.6.879>

Google Scholar: [Author Only](#) [Title Only](#) [Author and Title](#)

Pedreira, J., Herrera, M.T., Zarra, I., and Revilla, G. (2011). The overexpression of AtPrx37, an apoplastic peroxidase, reduces growth in *Arabidopsis*. *Physiologia Plantarum* 141: 177–187.

Google Scholar: [Author Only](#) [Title Only](#) [Author and Title](#)

Prados-Rosales, R.C., Roldán-Rodríguez, R., Serena, C., López-Berges, M.S., Guarro, J., Martínez-del-Pozo, Á., and Pietro, A.D. (2012). APR-1-like Protein of *Fusarium oxysporum* Functions in Virulence on Mammalian Hosts\* □ S. 287: 11.

Google Scholar: [Author Only](#) [Title Only](#) [Author and Title](#)

Raaijmakers, J.M., Paulitz, T.C., Steinberg, C., Alabouvette, C., and Moëne-Loccoz, Y. (2009). The rhizosphere: a playground and battlefield for soilborne pathogens and beneficial microorganisms. *Plant Soil* 321: 341–361.

Google Scholar: [Author Only](#) [Title Only](#) [Author and Title](#)

Rashid, M.I., Mujawar, L.H., Shahzad, T., Almeelbi, T., Ismail, I.M.I., and Oves, M. (2016). Bacteria and fungi can contribute to nutrients bioavailability and aggregate formation in degraded soils. *Microbiological Research* 183: 26–41.

Google Scholar: [Author Only](#) [Title Only](#) [Author and Title](#)

Ristaino, J.B. and Records, A eds (2020). *Emerging plant diseases and global food security First.* (The American Phytopathological Society: St. Paul).

Google Scholar: [Author Only](#) [Title Only](#) [Author and Title](#)

Schneider, R., & Di Pietro, A. (2013). The CAP protein superfamily: function in sterol export and fungal virulence, *Biomolecular Concepts*. 4(5): 519-525.

Google Scholar: [Author Only](#) [Title Only](#) [Author and Title](#)

Schwacke, R. Ponce-Soto, G.Y., Krause, K., Bolger, A.M., Arsova, B., Hallab, A., Gruden, K., Stitt, M., Bolger, M.E., and Usadel, B. (2019) MapMan4: A Refined Protein Classification and Annotation Framework Applicable to Multi-Omics Data Analysis. *Molecular Plant*. 12:879-892

Google Scholar: [Author Only](#) [Title Only](#) [Author and Title](#)



- Serrano, I., Audran, C., and Rivas, S. (2016). Chloroplasts at work during plant innate immunity. *EXBOTJ* 67: 3845–3854.  
Google Scholar: [Author Only](#) [Title Only](#) [Author and Title](#)
- Sopeña-Torres, S. et al. (2018). YODA MAP3K kinase regulates plant immune responses conferring broad-spectrum disease resistance. *New Phytol* 218: 661–680.  
Google Scholar: [Author Only](#) [Title Only](#) [Author and Title](#)
- de Souza, A, Wang, J.-Z., and Dehesh, K. (2017). Retrograde Signals: Integrators of Interorganellar Communication and Orchestrators of Plant Development. *Annu. Rev. Plant Biol.* 68: 85–108.  
Google Scholar: [Author Only](#) [Title Only](#) [Author and Title](#)
- Staal, J., Kaliff, M., Bohman, S., and Dixelius, C. (2006). Transgressive segregation reveals two *Arabidopsis* TIR-NB-LRR resistance genes effective against *Leptosphaeria maculans*, causal agent of blackleg disease. *The Plant Journal* 46: 218–230.  
Google Scholar: [Author Only](#) [Title Only](#) [Author and Title](#)
- Strange, R.N. and Scott, P.R. (2005). Plant Disease: A Threat to Global Food Security. *Annu. Rev. Phytopathol.* 43: 83–116.  
Google Scholar: [Author Only](#) [Title Only](#) [Author and Title](#)
- Taylor, J.W. and Berbee, M.L. (2006) Dating divergences in the Fungal Tree of Life: review and new analyses. 98(6): 838-849.  
Google Scholar: [Author Only](#) [Title Only](#) [Author and Title](#)
- Thatcher, L.F., Gardiner, D.M., Kazan, K., and Manners, J.M. (2012). A Highly Conserved Effector in *Fusarium oxysporum* Is Required for Full Virulence on *Arabidopsis*. *MPMI* 25: 180–190.  
Google Scholar: [Author Only](#) [Title Only](#) [Author and Title](#)
- Thatcher, L.F., Manners, J.M., and Kazan, K. (2009). *Fusarium oxysporum* hijacks COI1-mediated jasmonate signaling to promote disease development in *Arabidopsis*. *The Plant Journal* 58: 927–939.  
Google Scholar: [Author Only](#) [Title Only](#) [Author and Title](#)
- Todesco, M. et al. (2010). Natural allelic variation underlying a major fitness trade-off in *Arabidopsis thaliana*. *Nature* 465: 632–636.  
Google Scholar: [Author Only](#) [Title Only](#) [Author and Title](#)
- Tian, F., Yang, D.-C., Meng, Y.-Q., Jin, J., and Gao, G. (2019). PlantRegMap: charting functional regulatory maps in plants. *Nucleic Acids Research*: gkz1020.  
Google Scholar: [Author Only](#) [Title Only](#) [Author and Title](#)
- de Torres Zabala, M. et al. (2015). Chloroplasts play a central role in plant defence and are targeted by pathogen effectors. *Nature Plants* 1: 15074.  
Google Scholar: [Author Only](#) [Title Only](#) [Author and Title](#)
- van der Biezen, E.A, Freddie, C.T., Kahn, K., Parker, J.E., and Jones, J.D.G. (2002). *Arabidopsis* RPP4 is a member of the RPP5 multigene family of TIR-NB-LRR genes and confers downy mildew resistance through multiple signalling components. *Plant J* 29: 439–451.  
Google Scholar: [Author Only](#) [Title Only](#) [Author and Title](#)
- Veloso, J. and Díaz, J. (2012). *Fusarium oxysporum* Fo47 confers protection to pepper plants against *Verticillium dahliae* and *Phytophthora capsici*, and induces the expression of defence genes: Fo47 protection of pepper through defence induction. *Plant Pathology* 61: 281–288.  
Google Scholar: [Author Only](#) [Title Only](#) [Author and Title](#)
- Viljoen, A, Ma, L.-J., & Molina, A. B. (2020). Fusarium wilt (Panama disease) and monoculture banana production: Resurgence of a century-old disease. In A Records & J. Ristaino (Eds.), *Emerging plant diseases and global food security*. St Paul: APS Press. 159-184.  
Google Scholar: [Author Only](#) [Title Only](#) [Author and Title](#)
- Vlaardingerbroek, I., Beerens, B., Rose, L., Fokkens, L., Cornelissen, B.J.C., and Rep, M. (2016a). Exchange of core chromosomes and horizontal transfer of lineage-specific chromosomes in *Fusarium oxysporum*: Chromosome transfer and exchange in *F. oxysporum*. *Environ Microbiol* 18: 3702–3713.  
Google Scholar: [Author Only](#) [Title Only](#) [Author and Title](#)
- Vlaardingerbroek, I., Beerens, B., Schmidt, S.M., Cornelissen, B.J.C., and Rep, M. (2016b). Dispensable chromosomes in *Fusarium oxysporum* f. sp. *lycopersici*: Dispensable chromosomes in *Fusarium oxysporum*. *Molecular Plant Pathology* 17: 1455–1466.  
Google Scholar: [Author Only](#) [Title Only](#) [Author and Title](#)
- Wang, B., Yu, H., Jia, Y., Dong, Q., Steinberg, C., Alabouvette, C., Edel-Hermann, V., Kistler, H.C., Ye, K., Ma, L.-J., and Guo, L. (2020a). Chromosome-Scale Genome Assembly of *Fusarium oxysporum* Strain Fo47, a Fungal Endophyte and Biocontrol Agent. *MPMI*: MPMI-05-20-0116.  
Google Scholar: [Author Only](#) [Title Only](#) [Author and Title](#)

Wang, W., Feng, B., Zhou, J., and Tang, D. (2020b). Plant immune signaling: Advancing on two frontiers. *J. Integr. Plant Biol* 62: 2–24.

Google Scholar: [Author Only](#) [Title Only](#) [Author and Title](#)

Wang, Z., Wang, F., Hong, Y., Huang, J., Shi, H., and Zhu, J.-K. (2016). Two Chloroplast Proteins Suppress Drought Resistance by Affecting ROS Production in Guard Cells. *Plant Phy.* 172(4):2491–2503.

Google Scholar: [Author Only](#) [Title Only](#) [Author and Title](#)

White, J.F., Kingsley, K.L., Zhang, Q., Verma, R., Obi, N., Dvinskikh, S., Elmore, M.T., Verma, S.K., Gond, S.K., and Kowalski, K.P. (2019). Review: Endophytic microbes and their potential applications in crop management. *Pest Manag Sci.* 75(10):2558–2565.

Google Scholar: [Author Only](#) [Title Only](#) [Author and Title](#)

Williams, A.H. et al. (2016). Comparative genomics and prediction of conditionally dispensable sequences in legume-infecting *Fusarium oxysporum* formae speciales facilitates identification of candidate effectors. *BMC Genomics* 17:191

Google Scholar: [Author Only](#) [Title Only](#) [Author and Title](#)

Yang, H., Yu, H., and Ma, L.-J. (2020). Accessory Chromosomes in *Fusarium oxysporum*. *Phytopathology*®: PHYTO-03-20-006.

Google Scholar: [Author Only](#) [Title Only](#) [Author and Title](#)

Zhang, Y., Yang, H., Turra, D. et al. (2020). The genome of opportunistic fungal pathogen *Fusarium oxysporum* carries a unique set of lineage-specific chromosomes. *Commun Biol.* 3:50.

Google Scholar: [Author Only](#) [Title Only](#) [Author and Title](#)

Zhou, F., Emonet, A., Dénervaud Tendon, V., Marhavy, P., Wu, D., Lahaye, T., and Geldner, N. (2020). Co-occurrence of Damage and Microbial Patterns Controls Localized Immune Responses in Roots. *Cell* 180: 440-453.e18.

Google Scholar: [Author Only](#) [Title Only](#) [Author and Title](#)
